# Supplementary material for: COVID-19 Vaccine Hesitancy: Analysing Twitter to Identify Barriers to Vaccination in a Low Uptake Region of the UK
Source: Front Digit Health. 2022 Jan 24;3:804855. doi: 10.3389/fdgth.2021.804855 (PMC8818664; doi:10.3389/fdgth.2021.804855)
Supplement: Supplementary file 1 [file Table_1.XLSX]

## Sheet: Test
No.	Tweet Content
1	NHS to enlist 'sensible' celebrities to persuade people to take coronavirus vaccine https://t.co/dUh06FZnY3
2	@LBC @NickFerrariLBC The trouble is nobody knows so we would have to have 3 scotch eggs for 3 pints it’s not worth pubs opening and it’s exactly what the government want keep it all closed till Easter you’ll notice that the supposed vaccine is being rolled back a bit every day
3	Pis need to get a grasp on reality re covid/related shares Look at the stupid sp lvls you're ramping c.f the price of a co. like #pfizer who has dvlpd a covid-vaccine & is a global blue chip giant w massive product p/f worldwide Start getting real peeps &stop being delusional..
4	I hope yall have your vaccine passport and have read the requirements, because ticket or no ticket wizkid won’t be seeing you
5	I don’t agree with vaccine passports for getting a coffee. Going to a club, going to a concert, going to the theatre, getting on a plane, I understand, but for a coffee?? This kind of two tier society is not what we need. And certainly shouldn’t have to produce photo ID!
6	Vaccine passports for university lectures: one more reason for students not to get out of bed
7	When I see you need a covid vaccine to fly out.... https://t.co/oew4CpJs25
8	@BigSV @ProfKarolSikora There is no point in the vaccine passport; its not about the vaccine. It makes no logical sense. I would argue with some assumptions in that schematic. Unvaccinated are not likely to be symptomatic; depends on age and health for example.
9	People will sniff coke but complain about taking a covid vaccine ??
10	How COVID vaccines are being divvied up around the world #CovidVaccine https://t.co/hQRcaSljjS
11	@MattHancock Please explain why there has never been a safe coronavirus vaccine before & how we have one approved (by a country with one of the worst covid stats)in 10 months when vaccines usually take 10 years. Also why are the MHRA expecting many adverse reactions?https://t.co/I4vetN5Wlr
12	If you’re using thalidomide as an excuse to not have the Covid vaccine, I implore you to actually read about thalidomide and what went wrong
13	why is there all this talk about covid vaccine distribution when we can just send it out from the 5G towers i dont get it
14	@pfizer could you not just make the Covid vaccine for cost, or did greed get in the way again,if you couldn't do that,you should be charging no more than at least 1dollar a shot you do yourselves no favours when making extortionate profits from misery. Have a ??. People before ££
15	If right wing dickheads want to turn the covid vaccine into another front in their dumb-fuck culture war, I say we just keep quiet and let natural selection do its thing.
16	Coronavirus/vaccines: spills and spoils https://t.co/SVreT7FHZY
17	Coronavirus/vaccines: spills and spoils https://t.co/hcdeQmRJEY
18	The thing about prominent public figures getting the vaccine on TV is people who think it's a conspiracy are gonna say they were given a fake vaccine
19	Cringing at the lack of acknowledgement for the *international* effort behind COVID vaccine development...credit for the Pfizer/BioNTech vaccine certainly does not belong to the UK ??????? https://t.co/TmjsB0LhlQ
20	This vaccine is approved..... but it is NOT licensed. They’ve actually changed regulations to support the roll out of an unlicensed vaccine. Fucking hell ?? how are people getting so excited about this #COVID19 #vaccine https://t.co/jPJulL09ID
21	Sounds like they won't be vaccinating people who are breastfeeding ?? https://t.co/z2lHQR65sQ See point 4.6 in Information for Healthcare Professionals doc: https://t.co/r6MJ39GXKT
22	Though it needs to be stored at -70C Anti-Covid vaccine can be transported at 2C to 8C and is stable for five days at that temperature says Prof Ugur Sahin...to whom I suspect the world will owe a great debt #BioNTech #vaccine #COVID?19 #COVID19 https://t.co/gjXlwQpJwt
23	UK didn't scrutinize Pfizer coronavirus vaccine trial data as carefully as US FDA is, Fauci says https://t.co/IYTfqMOhij
24	Someone messaged me on FB to say the vaccine contained a microchip because Moderna contains the letters 'RNA' - so I'm resharing this very helpful WHO training on speaking to people who say things about vaccines that aren't true https://t.co/7MH7f8WRl8
25	Not a good look when you want life to get back to normal and people to come forward to be vaccinated. But neither is lying about Brexit contributing to speedy release, nor that we are bigger and better than anyone else at anything. Vaccine not looking so enticing with this info https://t.co/uCEFlo1Tvk
26	@CNN No cure for cancer or flu but they come up with a covid vaccine within the year ?? I for one won't trust it
27	Dr Anthony Fauci accuses Britain of rushing to approve the Pfizer coronavirus vaccine too quickly https://t.co/vQQMPf0sKH
28	The priority list for the Pfizer vaccine - and how it will be rolled out https://t.co/VovgTeQiHo https://t.co/lIy3zy011U
29	COVID vaccine setback: Pfizer admits it can ship only HALF the 100M doses it promised globally by the end of 2020 after 'supply chain problems' - but Moderna says it's on to deliver 20M to the US this month via https://t.co/rc3qSaeZia https://t.co/AUA7KAwikq
30	When you have a big platform the last thing you should be doing is spreading anti vaccine propaganda ??
31	If I get any unpleasant side-effects from the Covid vaccine, I'll write a negative review on TripAdvisor.
32	Honestly, I cannot wait for the vaccine to sort out this coronavirus business so we can stop ignoring scientists about viruses and get back to ignoring scientists on climate change.
33	… one requires cold storage and shipping that would be too difficult … Moderna COVID vaccine best for Nunavut because of storage, ... - https://t.co/aPrtFnlj1w
34	In relation to an earlier video being shared, please refer to the link for any concerns and questions regarding the COVID vaccine https://t.co/ciz1neFTq3
35	UN warns 2021 to be humanitarian catastrophe, poor could be 'trampled' amid vaccine push - Coronavirus Outbreak News https://t.co/r7t8DkQZLE
36	FDA Career Staff Are Delaying the Vaccine As Thousands of Americans Die - FDA regulators are wasting precious time in greenlighting a COVID vaccine as more than 2,000 Americans are dying each day and the pandemic continues to starve American society. https://t.co/ndcXQnS7Em
37	After the bullshit we've had to go through, every covid vaccine should come with this level of service https://t.co/QI69En40Od
38	So I’ve not long found out that one of the covid vaccines has only been tested on white people. Which makes no sense as “bame” are the more at risk group and have been neglected once again in research.
39	@fesshole I bet this person will refuse to the take a COVID vaccine.
40	Senior German politicians are now saying that even those that have tested and are negative, should not be allowed into cinemas, restaurants and bars, which should be reserved for only those vaccinated. The 'vaccine passport' is mov…https://t.co/4U6UvmAea6 https://t.co/l0oNZah861
41	If you’ve ever got a piercing done in Claire’s Accessories you shouldn’t be afraid of the covid vaccine
42	@BAFTAGames Don't know why we're wasting time on a Covid vaccine, when these sick people are out here suffering.
43	UK trial to mix and match Covid vaccines to try to improve potency https://t.co/aBi436fPns
44	China drugmaker fact-checks claim that its leading COVID vaccine is 97% effective #HIV #PLHIV #endHIVstigma https://t.co/RtS669r5L1 via @FortuneMagazine
45	FDA: Pfizer Covid vaccine data fits with guidance on emergency authorization https://t.co/hTG4uBJgyz
46	Bare ppl worried and stressing about the COVID vaccine you do realise we’re not even on the priority list
47	?It's nice when things align. ??8/12/20 - The day the Pfizer/BioNTech Covid-19 vaccine was first rolled out in the world. ??8/12/20 - The day 'We Go Way Back' podcast published an episode exploring the history of vaccinations. https://t.co/QEi99Jk1OH
48	•FDA said data from Pfizer's Covid vaccine trials show that side effects are common, though there are “no specific safety concerns identified that would preclude issuance of an” emergency use authorisation https://t.co/v1E2ouL7DR
49	First no COVID MBE and now no COVID vaccine - I’m getting p*ssed off now
50	Trial participants say to brace yourself for intense symptoms after the second shot of the Covid vaccine @CNBC https://t.co/MUXZvOYLir
51	Rich countries hoarding Covid vaccines, says People's Vaccine Alliance https://t.co/hJuHGb3f5j
52	Just seen that they are advising people who have strong allergic reactions not to take the Pfizer COVID vaccine. With a history of quite a few reactions, my anxiety levels are ridiculous now.
53	#UK warns those with severe allergy shouldn’t get Pfizer Covid vaccine https://t.co/bYwKyn651x
54	Potential Pfizer COVID vaccine allergic reactions should not make public "anxious" https://t.co/Mbn1A5L5bV
55	EU Medicines Agency hacked, BioNTech-Pfizer coronavirus vaccine paperwork stolen, probe launched https://t.co/04ZYn09Wtc
56	Oxford coronavirus vaccine results leave regulators with 'dilemma', warns scientist https://t.co/XiJKXaY5Kf
57	@Intuitive1966 @twilouhom Had a text this morning from my doctor saying that they are about to roll out the vaccine and they would contact people when it's "their turn"... oh joy ??????
58	A lot of adults don’t understand how vaccines actually work and that’s slightly worrying ??
59	@Quicktake @amnesty @Oxfam what are lot of rubbish we need to be vaccinated if you want to vaccinate other people also you're always have to order extras because things go wrong and when it comes comes to poor countries people are dying their all the time anyway due to disease and starvation
60	If you don’t wash your ass after you shit you don’t need to worry about what’s in the vaccine
61	If you like your steak medium rare and under, don’t worry about what’s in the vaccine
62	if u reply to every single comment on your insta posts don’t worry abt the vaccine , the damage is done
63	Fam the vaccine needs to worry about what’s in the eater https://t.co/iqvdCaO5b2
64	no joke i think i’m having an allergic reaction to this vaccine ??
65	if you don’t wash your ass after you use the toilet, don’t worry about what’s in the vaccine https://t.co/5eK9RyxgPv
66	Coronavirus vaccine scam warning as Britons duped into PAYING for free jab https://t.co/8MRKzbVh2p
67	If you chew on pens, don’t worry about what’s in that vaccine
68	The shambles begins: Dozens of GP practices in England opt out of Covid vaccine rollout https://t.co/jk4dOH6fwW via @Yahoo
69	I heard the covid vaccine actually contains a small audio speaker so you can hear her discuss being cancelled from within your veins https://t.co/2IpyjOrl3C
70	So they can find a vaccine for COVID but the can't find a vaccine for delays on the London Underground ???? really makes u think
71	If you eat chicken and chips on the bus, don’t worry about what’s in the vaccine x
72	What has been a bit upsetting is that while we say Islam is relevant for every aspect of life, I have only seen two published fatwas in the west about the covid vaccine. The gap between the general public and scholarship is already big, and this doesn't help in closing that gap.
73	Covid: Australian vaccine abandoned over false HIV response https://t.co/nuOssb16j5
74	Pfizer's Covid vaccine approved by FDA for emergency use https://t.co/7Gjgf6At0y
75	If they don't know if vaccines prevent asymptomatic covid then the drug trials are inadequate https://t.co/bRs0BVM1gd
76	New article: "IBM - Cybercriminals are Now Targeting COVID Vaccine Distribution" has been published on Fintech Zoom - https://t.co/GILtZXsyJf @FintechZoom #Fintech #Blockchain #Crypto #Cryptocurrency #ICO https://t.co/SBlhSdmYKQ
77	.@Pfizer will rake in billions from its expensive covid vaccine but @AlbertBourla refuses to cut the price for lower income countries - costing countless lives https://t.co/PwHyUbj8w0
78	.@Pfizer will rake in billions from its expensive covid vaccine but @AlbertBourla refuses to cut the price for lower-income countries - costing countless lives https://t.co/LCc3Q1i3Sz
79	If you let your bunda touch public toilet seats don’t worry about what’s in the vaccine x
80	You could have solved the AIDS crisis by amputating every dingle dangle, but it would have been a gross violation of every man's body, and absolutely disproportionate to the problem. Mandatory face masks and vaccines for Covid are the same.
81	.@Pfizer will rake in billions from its expensive covid vaccine but @AlbertBourla refuses to cut the price for lower income countries - costing countless lives https://t.co/CZlVufvwUm
82	.@Pfizer will rake in billions from its expensive covid vaccine but @AlbertBourla refuses to cut the price for lower income countries - costing countless lives https://t.co/DViirUGrD9
83	.@Pfizer will rake in billions from its expensive covid vaccine but @AlbertBourla refuses to cut the price for lower income countries - costing countless lives https://t.co/JrpVPdWKmJ
84	.@Pfizer will rake in billions from its expensive covid vaccine but @AlbertBourla refuses to cut the price for lower income countries - costing countless lives https://t.co/jdkGR9QCcc
85	.@Pfizer will rake in billions from its expensive covid vaccine but @AlbertBourla refuses to cut the price for lower income countries - costing countless lives https://t.co/l3V1D7DGBy
86	.@Pfizer will rake in billions from its expensive covid vaccine but @AlbertBourla refuses to cut the price for lower income countries - costing countless lives https://t.co/u5JmTPQo7z
87	.@Pfizer will rake in billions from its expensive covid vaccine but @AlbertBourla refuses to cut the price for lower income countries - costing countless lives https://t.co/jQlPOA90yD
88	.@Pfizer will rake in billions from its expensive covid vaccine but @AlbertBourla refuses to cut the price for lower income countries - costing countless lives https://t.co/toDrBYPmsb
89	If you drink Supermalt you don’t need to worry about what’s in the Vaccine
90	If u eat pork don’t worry abt what’s in the vaccine
91	In US, most innovations on the vaccines are being under-reported, and large swathes of the population are Anti-Vaxx. Plus. with millions either un or under-insured, rolling out the vaccine in any way that isn't 'Free' will cause disaster.
92	@epatsss indians in general shouldn’t worry about the vaccine
93	If you put milk in before cereal then don’t worry about what’s in the vaccine
94	For real, if you eat bbq base pizza don’t worry about what’s in the vaccine
95	People who eat these don’t need to worry about what’s in the vaccine https://t.co/Ob0veyBdhP
96	Really fed up of this corona shit now. Mad how they find a vaccine that supposedly works for it but still haven’t found a cure for cancer. Get out of here man??
97	Maybe Cyril is gonna announce they're rolling out of the vaccine soon ????????????
98	‘Moral issue’: African official blasts COVID vaccine inequality | Coronavirus pandemic News | Al Jazeera https://t.co/DCE6gDkl1h via @AJEnglish ??
99	Black folk still need to take the COVID vaccine but I honestly have no time for White ppl blowing the anti-vaxer horn when Black ppl share their fears. This isn't the same conversation as your middle class White mum who just discovered essential oils & herbs.
100	if u don’t hate men don’t worry about what’s in the vaccine x
101	If u listen to sahbabii then don’t worry what’s in the vaccine
102	If you don’t own a BRITA filter don’t worry about what’s in the vaccine
103	You realise there’s dangerous side-effects to literally ever medication or vaccine EVER, right? Even things as simple as contraceptive pills have been linked to cancer, so stop harping on about side effects of the Covid Vaccine like it’s any different.
104	You realise there’s dangerous side-effects to literally ever medication or vaccine EVER, right? Even things as simple as contraceptive pills have been linked to cancer, so stop harping on about side effects of the Covid Vaccine like it’s any different.
105	@MattHancock Time to stop throwing good money after bad - no point in mass testing for the sake of it. Only solution lies in rolling out those vaccines ASAP. Scrap mass testing and throw all resources and efforts behind mass vaccination strategy.
106	If you use the same password to login to *all* of the websites, you don’t need to worry about what’s in the vaccine.
107	Also labelling people who have genuine concerns at the speed of the covid vaccine as anti vaxxers isn’t fair
108	If you eat mutura don’t worry about what’s in the vaccine ????
109	Ethnic minorities are more reluctant to take the coronavirus vaccine over anti-vaxxer fears, says study via https://t.co/vq1xWqpq1z https://t.co/lDu3NuEJSH
110	Asia plays the long game on Covid vaccine rollout https://t.co/kaozFvl3I6
111	accidentally farted out the covid vaccine
112	Scheme to get Covid vaccine to poorer countries at 'high risk' of failure https://t.co/uzAoXkUCU9
113	if you’ve ever urinated in a swimming pool u don’t need to worry about what’s in the vaccine
114	If you’ve ever walked barefoot in a uni halls kitchen you don’t need to worry about what’s in the vaccine
115	Accountability must be like the Covid vaccine because, people refusing to take it.
116	If you put your lips on these back at school, you don’t need to worry about what’s in the vaccine https://t.co/9JQoqCM8Ip
117	If you’re posting apple music links, don’t worry about what’s in the vaccine.
118	If you eat Saltfish then don’t worry about what’s in the Covid vaccine ????
119	If you eat Saltfish then don’t worry about what’s in the Covid vaccine ????
120	If u eat ass, don’t worry about what’s in the vaccine ????
121	The audacity these anti-vaxxers have to refuse covid vaccine....... I just don’t get it...
122	If you ever ate here don’t worry about what’s in the vaccine https://t.co/WyOPQSDD4J
123	If you’ve ever eaten what a young child has baked/cooked in a home ec class you don’t need to worry about what’s in the vaccine.
124	Scheme to get Covid vaccine to poorer countries at 'high risk' of failure https://t.co/eAkNNymkXQ
125	@harrowboy66 @1ossieosgood Pat, you have got to stop reading utter nonsense, no one can sack you for not having a vaccine, there a millions of anti-vaxxers out there that have never even had an mmr
126	Markets set for a coronavirus vaccine led recovery in 2021 https://t.co/vM5oHTbpwN
127	If you’ve ever smelt the air in XXL, then you really don’t need to worry about the vaccine.
128	According to that Covid vaccine calculator won’t get the vaccine until next summer https://t.co/FKF1fJSPGg
129	If you still smoking swishers don’t worry about what’s in the vaccine
130	If you smoke with baccy don’t worry about that vaccine
131	If you’ve eaten a rustlers burger you don’t need to worry about the vaccine
132	pretty sure that dirty pints do the same as the covid vaccine
133	Mike Pence gets COVID vaccine, says he "didn't feel a thing" https://t.co/r9zThxI3No via @Newsweek
134	If you eat ass don’t worry about what’s in the vaccine
135	A lot of people don’t actually know how to use “don’t worry about the vaccine” thing https://t.co/OFzldPeIdy
136	A lot of people don’t actually know how to use “don’t worry about the vaccine” thing https://t.co/OFzldPeIdy
137	Lol @ the videos of ppl taking Covid vaccines
138	If you skip delicious ft tommy cash don’t worry about what’s in the vaccine
139	To make a point my coworker showed me a vid of a medical professional fainting after having the covid vaccine - of course she ducking fainted mate, she’s a key worker, she’s probably coasting on 2 hours sleep, 6 cappuccinos and half a belvita. ??????
140	To make a point my coworker showed me a vid of a medical professional fainting after having the covid vaccine - of course she ducking fainted mate, she’s a key worker, she’s probably coasting on 2 hours sleep, 6 cappuccinos and half a belvita. ??????
141	If you ever had street food from India in your lifetime... don’t worry about what’s in the vaccine
142	straight ppl will raw finger eachother on public transport after not using hand sanitizer but they’re worried about the vaccine ??
143	if you lick your finger before turning the page don’t worry about what’s in the vaccine
144	if you’ve been to reading festival u don’t need to worry about what’s in the vaccine
145	If you were able to watch this video without dying don’t worry about what’s in the vaccine you’re immune to everything https://t.co/a9z4sRimAT
146	#Marr please don't be stupid and make the most normal and rational #UTurn ...is for all of us Europeans...stop???????? #BrexitDisaster and work together against this bloody #Covid_19 ...also people please vaccinate ??????. Work together for the future #Christmas2020 in 2021??
147	England's new Covid restrictions likely to stay 'for months' until vaccine rollout https://t.co/DJMpXV4HqH
148	Should have done it in February, you mendacious buffoons England's new Covid restrictions likely to stay 'for months' until vaccine rollout https://t.co/VwBV3fIKFD
149	if u don’t use a lotta u don’t need to worry bout the vaccine
150	#waityourturn I was expecting it, but it doesn't make me any less revolted. Wealthy #Americans place a price on your life by "buying" their Covid vaccines. Name and shame these #queuejumpers. #vaccine #vaccination #medtwitter #Covid_19 https://t.co/3Jd786xpWG
151	If you’ve ever been here, don’t worry about what’s in the vaccine https://t.co/vPc53tlARn
152	.@Pfizer will rake in billions from its expensive covid vaccine but @AlbertBourla refuses to cut the price for lower income countries - costing countless lives https://t.co/1Tlxu9Coer
153	@wanderlust4369 Yes I am going to Enchanted but I am not sure that it will go ahead. Infection rates are high and although people are getting vaccinated they probably won’t have given it to enough people to make an indoor event viable. I still have hope but it’s fading. ??
154	Dont be deceived by the covid vaccine this is what it is doing to people https://t.co/puT80js6Wl
155	New covid strain, possible vaccine resistance, fucking Tory cunt government, dark miserable midwinter, and everyone with their hot takes and fighting each other. Today has been fucking bleak
156	What if there’s no such thing as the ‘mutant strain’ of Covid and it’s just an excuse to cover that the vaccine never worked at all.
157	What if there’s no such thing as the ‘mutant strain’ of Covid and it’s just an excuse to cover that the vaccine never worked at all.
158	If you use snap maps, don’t worry if there’s a chip in the vaccine
159	Its going to be absolutely wild if it turns out the vaccine doesnt work against this new strain of the virus.
160	@drphilhammond Totally predictable. I’m so angry. And we’re trying to vaccinate people on top of the day job. Plus staff off sick/isolating
161	@FardaCeebo but the vaccine might not even work for the new strain
162	?? If you’ve ever been here, you don’t need to worry about what’s in that vaccine.. *?????? ??????’?? ???????? ?? ?????? ?????????? ???????? ???????? ????’?? ?????? ????????, ????????? ?? https://t.co/cLVl3jJxTB
163	if you wake up and put on jeans while having no plans of leaving your house, don’t worry about what’s in the vaccine
164	anyone who refuses a COVID vaccine should have to help out in the mortuaries if we see 5,000 deaths from it a day.... holy fucking shit.
165	If you’ve ever been to Ocean, don’t worry about what’s in the vaccine
166	shambles that we should be happy that vaccinations are under way and that second doses are coming up soon for those who were first but instead we're worrying if we'll have any fresh veg in britain next week and crashing out of the EU without a trade deal??
167	If you ever came in dead last playing musical chairs do not worry about what’s in the covid vaccine
168	If you ever came in dead last playing musical chairs do not worry about what’s in the covid vaccine
169	If you went to Isis, a Nottingham club on an industrial estate that doubled as an Ancient Egyptian-themed strip joint on non-student nights and had an illegal fairground at the back, you don’t need to worry about the vaccine
170	"UK has a new strain" Sigh.... Rona has already mutated 4 times by the time people started getting vaccinated.
171	Coming into work early means listening to covid/vaccine conspiracy theories ??
172	If you ever drank trebles in Gotham Town, you don’t need to worry about what’s in the vaccine.
173	If you’ve ever been here, you shouldn’t worry about what’s in the vaccine https://t.co/gS2NizFYXF
174	Woman died from covid vaccine lol
175	If you have aloo in your Biryani don’t worry about what’s in the vaccine ?? https://t.co/DJlPmOihDz
176	If you owned a Paul’s Boutique bag in 2012 don’t worry about what’s in the vaccine
177	If u back wrays wit out a chaser don’t worry about what’s in the vaccine
178	If you slide into Twitter dms don’t worry about what’s in the vaccine ??
179	if you eat kroush or la7me neye you shouldn’t worry about the vaccine ??
180	If you drink Supermalt you don’t need to worry about what’s in the vaccine ??
181	men be like "i dont wan't the covid vaccine! i don't know what's in it!" then eat hotdogs and drink monster energy
182	I literally have a masters degree in pharmacy but my relatives will choose to believe a poorly written forwarded whatsapp message saying the covid vaccine contains fetus cells over me
183	if you had PE in the school hall straight after lunch don’t worry about what’s in the vaccine x
184	rumour has it this is what happens to you when you get the covid vaccine https://t.co/1sNfbNumVN
185	How stupid the only people that have an idea are the Australians They announced 4 weeks ago anyone with Allergies against antibiotics Peniccilin and other Allergies must NOT have the Covid Vaccine Why didn't USA UK know this @toryboypierce
186	If you’ve ever slurped a drink off a surface after saying “spillage is lickage” you do not need to worry about what’s in the vaccine
187	Covid vaccine contains polyethylene glycol also known as PEG This is crap Will trigger adverse reactions Another reason to give this the swerve #Covid1984 https://t.co/HyH4MyYANY
188	Covid vaccine not reaching care homes with 12,000 being 'failed' by Government https://t.co/rES08axeFN
189	Worry over Pfizer Covid Vaccine as 4 volunteers Developed Facial Paralysis Symptomps after taking shots https://t.co/gV6syNqhtT
190	Worry over Pfizer Covid Vaccine as 4 volunteers Developed Facial Paralysis Symptomps after taking shots https://t.co/gV6syNqhtT
191	Oxford coronavirus vaccine: 10,000 medics and volunteers recruited to administer jab https://t.co/OcNZYgCSJi
192	Only a joke: As I got vaccinated they gave me a card for my next appointment, why? I thought now that I am chipped, they can track me down to give me the second dose #CovidVaccine #COVID?19
193	If you eat candy corn, you don’t need to worry about what’s in the vaccine.
194	I overhead someone speaking and saying they are throwing vaccine in the bin unused, you should have backup patients for slippage #stopthewaste @MattHancock #NHS #vaccine @NHS @guardian NHS doctors 'scrabbling' to get vaccine amid alarm at Covid variant https://t.co/HGpKYBNCMN
195	I’m sorry, but if @RishiSunak is found to have been making personal profits from investing in COVID vaccine companies, he needs to be sacked. Does conflict of interest have no meaning to the @Conservatives ? So, so corrupt. https://t.co/Jj8XY2JtYf
196	If you’ve ever been in this pool you don’t need to worry about what’s in the vaccine https://t.co/UfaXMGeY57
197	@Longm8 @CloudwaterPaul The notion that we go back to "normal" is such an irresponsible idea without any credible evidence of willingness to learn from science. It's going to be 3 years minimum before enough people on the planet have been vaccinated against this virus. We are a long way from "normal".
198	You influencers who have BBL’s and lip fillers have the nerve to talk about the dangers of a COVID vaccine??? ??????????
199	Had a boyfriend who cleaned his teeth once a day and never moisturised I ain’t worried what’s in that damn vaccine
200	I really don't understand why we don't go for a full, proper lockdown for a month and focus on fast roll-out of the vaccine. Let's get this done once and for all.
201	This is beyond alarming. We need to roll out this vaccine much faster https://t.co/10fEt5ftpn
202	@UKCovid19Stats 2020 has been a terrible year with Covid and by the looks of the figures increasing every day 2021 is going to start off even worse . Roll on the vaccine so we can attempt to get back to a normal life
203	I fear the government is doing it the other way round, due to their HUGE fuck up with care homes and they are now trying to be seen to be doing something. However, this is just exposing the fact that, the wrong people are being vaccinated first.
204	@LondonNeolibs COVID vaccines shouldn’t be auctioned to the highest bidder
205	@mauro_txt So how do we know its really covid vaccine not an empty syringe you just struck on your arm ??
206	Many uncertainties in the rapidly developing market for vaccines. But COVAX can't be allowed to fail. This would impact human development & fragile emerging economies for decades. "Scheme to get Covid vaccine to poorer countries at 'high risk' of failure" https://t.co/eJCMOxSVZK
207	@BorisJohnson - that will be enough crowing about your mouldy cup-cake of a regressive brexit deal. We now have 2 to 3 months of serious C19 misery ahead so FFS can you at least try to get ahead of things this time before the vaccine saves us from your slow motion incompetence.
208	Tesco offers to help with roll-out of Oxford vaccine https://t.co/pp8pSAiHqw
209	@ConceptualJames The true comedy is "We're using the Pfizer vaccine...roll up, roll up get yer jab here" whilst on the 27th Decemeber the BBC suddenly say "hold on the AstraZeneca vaccine is nearly ready but surely if the Pfizer vaccine worked we wouldnt need the AstraZeneca one. Lies, lies lies https://t.co/h3SbYLmrjj
210	@PHE_uk A 12 week delayed second dose is VERY CONCERNING, & devastatingly risky at global level. It might leave a large population only partially immunized -- risking viral evolution to become vaccine resistant. We might all become live petri dishes roaming around England?? @CMO_England
211	Fucktards. Covid vaccine: UK doctors criticise rescheduling of second doses https://t.co/pOsYzK1LgN
212	Fucktards. Covid vaccine: UK doctors criticise rescheduling of second doses https://t.co/pOsYzK1LgN
213	@The_ArmaniCode It’s never going to be gone, lockdowns now are just a pointless exercise. The only thing that needs to be done is getting these vaccines out ASAP, and once 100% of the elderly and vulnerable are vaccinated, there should be no reason why normality doesn’t resume immediately
214	the book they were scared to publish ...available now #BorisJohnson COVID-19 Oxford/AstraZeneca COVID-19 vaccine Pfizer #BrexitReality Nigel Farage Los Angeles Times Big Ben Ginger Thatcher #Corbyn #FBPE fearless, last line - "the flag is burnt" https://t.co/JJNP3jm9Ew
215	So the second dose of the Pfizer vaccine could be wasted when not delivered within the correct amount of time. Is there anything @BorisJohnson can't fuck up? https://t.co/m5DwblTxFc
216	real talk, i love making money.... as much as i can. If i was told i could scare the shit out of someone and then offer the solution to there problems and make a massive profit from them then i will covid vaccines are the same shit MSM stirs your head then tells you the answer
217	New years resolutions list 1 Dont take covid vaccine 2 Dont vote it changes nothing 3 Block vegans they do your head in 4 Rebuke Islamists because rational dialogue is impossible 5 Unfollow and block Joe Biden because he is depressingly plain.
218	I might just take this COVID vaccine next month when they come to our hospital lol
219	Covid: 12-week vaccine gap defended by UK medical chiefs Paid ??????????????????????s https://t.co/CAnje2EtiU
220	No, the public does not thank you nor understand why you would not give the second dose of the vaccine within the recommended time frame! Chris Whitty moves to head off GPs' rebellion over vaccine doses https://t.co/WqhhbVAD8m
221	Is this just to be able to boast of high vaccination numbers?Covid vaccine: chief medical officers defend rescheduling of second doses https://t.co/rGM3TIks6B
222	Coronavirus live news: EU rollout of Pfizer vaccine may be disrupted by supply issues, BioNTech warns https://t.co/vBrDrgIzGa
223	If you’ve ever eaten a kebab at a random restaurant in Barbés, don’t worry about what’s in the Covid vaccine.
224	If you’ve ever eaten a kebab at a random restaurant in Barbés, don’t worry about what’s in the Covid vaccine.
225	Here's the third #Stfu award goes to this doughnut who believes that having the flu vaccine increases your risk to getting influenza You cannot make this shit up! ?? https://t.co/aa6oSxB8lJ
226	if you don’t like fleabag you don’t deserve the covid vaccine
227	Pfizer, however, say that two doses of their vaccine are required for maximum protection against Covid and that they did not have evidence that the first dose alone offers protection after three weeks.
228	given the total disaster they have made of *everything* - lockdown, test and trace, face masks - its got to be worrying that no. 10 are ignoring scientific advice on the vaccine: changing the time between doses and mixing up different types surely they can’t mess this up too ??
229	In April/May, when COVID #vaccine isn't working, don't let govt get away with blaming vaccine ineffectiveness on new COVID variants. If vaccines don't work, its solely because govt delayed administration of 2nd dose from 21 days to 12 weeks against #Pfizer advice. #Incompetence
230	Why the UK plans to delay the second doses of its COVID-19 vaccines https://t.co/WYiSrEMwyl
231	Look how many people Israel has vaccinated compared to us and France pathetic https://t.co/PWTWDes9M6
232	Delaying the second dose of Covid-19 vaccine; and schools and universities https://t.co/Pl6rdOreeM
233	@ShelaghFogarty @matthewcpinsent @nadhimzahawi vaccine roll out tzar ??????
234	Palestinians excluded from Israeli Covid vaccine rollout as jabs go to settlers | Israel https://t.co/wzuPRFDyNd
235	Don’t worry about the vaccine https://t.co/qIeXBRY1eO
236	Anyone receiving Covid vaccine should AVOID alcohol, experts warn https://t.co/hQWPnF2T51 via @MailOnline
237	So much for trust, the only question is would you recommend India's approved vaccines to your grandparents without worry? Anti-vaxxers are effectively moot in this country at this point https://t.co/fMBHObpLCP
238	#NAME?
239	@sophieplayssax It really does seem like the obvious thing to do until the vaccine is more underway, I can’t imagine how frustrating all the last minute decisions must be for you guys??
240	@marty__fish Vaccine roll out is already a mess. No cohesion compared to other countries who have far less supply (look up Israel) Don’t think another wave will happen though, not until next autumn but hopefully by then it’s treated much like any other respiratory illness in winter
241	if you’ve ever eaten a rustlers burger don’t worry about what’s in the vaccine
242	@SaraLouisexxxx They’ve all lost the plot. I have no faith in anyone of them anymore. The vaccine will improve things, not them, although I’m sure they’ll take credit for it. A 3rd lockdown is just a joke
243	You know if this vaccine don’t work, then it’s curtains..
244	Is there any group more #racist than israelis? Indigenous Palestinians excluded from Israeli Covid vaccine rollout as jabs go to foreigner settlers https://t.co/YEAOeQRpZX
245	How did we get to we don’t trust the vaccine to will the vaccine be rolled out to Africa ??
246	@MattHancock You lot have made a complete pigs ear out of all this from the start, and people have suffered greatly as a result. Who would really be shocked if your vaccine roll out turned out to be the next debacle tbh
247	No data to support delay of second Covid vaccine dose, say Pfizer and BioNTech https://t.co/rMrtBj9y8o
248	No data to support delay of second Covid vaccine dose, say Pfizer and BioNTech https://t.co/rMrtBj9y8o
249	Ofc some arse hole fraudsters are posing as the NHS and sending texts telling people to book the Pfizer/BioNTech COVID vaccine for which they have to provide bank details to prove identity to make the booking. Absolute chancers preying on people to scam.
250	Ofc some arse hole fraudsters are posing as the NHS and sending texts telling people to book the Pfizer/BioNTech COVID vaccine for which they have to provide bank details to prove identity to make the booking. Absolute chancers preying on people to scam.
251	People that barely passed GCSE science are now oracles on all things vaccine ??
252	If enough people are vaccinated for things to return anywhere near normal by 18 March then Matt Hancock can come to my birthday party.
253	Online Covid vaccine calculator reveals some will have to wait until 2022 https://t.co/nF2jxOtKcV
254	If you eat these you don’t need to worry about what’s in the vaccine https://t.co/EX5UguaHT4
255	@102Amadeus Schools opening first is just Johnson waffle. That is weeks away and reliant on Government getting vaccine rolled out. And then Johnson needs to prove safety and show he has control of test and trace to break transmission chains but he has failed for 9 months and counting.
256	Spent the last 2.5hrs trying to confirm details of the story about GPs stopping routine care to focus on delivering Covid vaccines but neither @NHSEnglandMedia or @DHSCmedia have responded with any information https://t.co/TR0q6oo53y
257	Logistics brigade so this better be about a supercharged vaccine roll out https://t.co/0qSPwyGCML
258	GP surgery visited by Matt Hancock to hail rollout of Oxford/AstraZeneca Covid vaccine did not have the jab ?? https://t.co/hkvjdvEGXH
259	High street pharmacies to start offering Oxford Covid vaccine next week https://t.co/MrV29sGpnT
260	So my mums had her COVID vaccine at last never seen so many people outside a doctors just got to wait for the 2nd one now
261	I'm completely with him - there's gotta be 1000 people max to be vaccinated of players + staff in the PL. We've already vaccinated over a million...surely this would take half a day to do...then football can continue to entertain those stuck inside who aren't vaccinated https://t.co/KzyadtnQY9
262	Vaccine ain't work https://t.co/kgdyDyKRnD
263	If you don’t like Mac and cheese you don’t need to worry about the vaccine https://t.co/3K0wQdM43D
264	If the Vaccine doesn’t get out there or work, this half arsed lockdown will be here past Easter. I’m not sure what the answer is and not advocating for harsher policing/law but can’t see what else there is https://t.co/h6XKSsMifR
265	Fucking scum COVID-19: Fraudster injected 92-year-old woman with fake coronavirus vaccine - and charged her £160 https://t.co/tBUfh3dmA6 https://t.co/nny1qdjALq
266	If you haven’t cleaned your kettle since you bought it don’t worry about the covid vaccine
267	If you haven’t cleaned your kettle since you bought it don’t worry about the covid vaccine
268	I’ve had my covid vaccine ???? https://t.co/EUr54R4C5y
269	Netherlands appears to have bought “the wrong needles” for its Pfizer Covid vaccines. Suitable for drawing 5 doses out each bottle, not the 6 their vaccination plans were based on. https://t.co/LDTTibeLt7
270	Coronavirus Vaccine Demand Has Health Officials Turning to Eventbrite https://t.co/bNSdOF2Luv https://t.co/BU65HY5BN7
271	@OMGitsAliA Bro if you can hear "Storm" you need to get the covid vaccine asap because you broken... ill allow brain needle but ain't no way am i hearing Brainstorm
272	If you ate these as a kid,don’t worry about what’s in the vaccine https://t.co/ftJuIxs8j4
273	@yorkiepud76 I think it’s going to take a long time. March we will start to see a defrost but we probably won’t see much return to normality till the Covid vaccine is bundled into the Flu jab and delivered with that.
274	@chestermissing Exactly. Why should a vaccine acquisition or roll out even have to go to tender. But it will and be abused like everything else the looting ANC does ??
275	People making grandiose statements about protecting our NHS while protesting vaccine passports and going clubbing & live music events shows your hypocrisy is absolute, don’t just clap for your doctors and nurses, do something and think
276	I’m gonna call it now - panicked UK govt vaccinates millions with only the first dose of vaccine, or gives second doses with different vaccine brands - we get to summer and we find out it’s not preventing people from getting corona - we go back to square one.
277	@nmonk_crohns @erika_jlover I know????the problem is I have been too much research onto every thing in the vaccine and I’ve scared myself????
278	@Conservatives Terrible people. I knew this was coming. Seams likely that you're stuffing up even this vaccine by playing with the timing of tbe second dose, just so you could send this out. So important was this for you that you run the risk of creating a resistant stain of CoVid-19.
279	#PMQs You just cancelled my 87 year old mother's 2 nd pfeizer vaccine, against their recommendations. You should have given us the choice of having this vaccine, when you were already cancelling others 2nd. This is scandalous and should never have been allowed.
280	When they release a pussy flavoured covid vaccine https://t.co/MOS7iHUoub https://t.co/RwQB1qKKv0
281	Second shots of Covid vaccine could be delayed further in England https://t.co/nRpWorK9x4
282	Not my dad's girlfriend declining the vaccine at work by saying "my vaccine is Jesus" ????
283	If you eat this you don’t need to worry about the vaccine https://t.co/VohbmifYvt
284	@silverrich39 The Pfizer jab is new technology Richard; Pfizer have stepped back from what is a government, not a scientific decision. What if we are giving vaccines this way and they are ALL rendered useless? The AZ vaccine is not new technology, which is why we can speculate on delay
285	Concern ahead of the vaccine roll out that the capital has so few centres to give the jab https://t.co/KHn6MIivo2 #elthamgreen #eltham #neighbourhoodwatch #greenwich #greenwichhour #nhw #saferneighbourhoods https://t.co/8BEIrB1aSh
286	Had to explain to a friend tonight that the covid vaccine actually has no dosage of covid itself in it. Maybe the gov could put their welly into an info campaign about that than finger wagging people not to go for takeaway bloody coffee
287	My second dose of the Pfizer vaccine has been delayed by almost TWO MONTHS. Livid doesn’t cut it: this isn’t what I consented for. https://t.co/Ox9WtOJvpx
288	Exclusive: Doctors told to throw away leftover Covid vaccines rather than giving second doses https://t.co/weJLE7XaDb
289	Exclusive: Doctors told to throw away leftover Covid vaccines rather than giving second doses https://t.co/weJLE7XaDb
290	Coronavirus: Pfizer to cut COVID vaccine deliveries in Europe as it upgrades production facility - Sky News https://t.co/6lT9Ho4zpW
291	Coronavirus: Pfizer to cut COVID vaccine deliveries in Europe as it upgrades production facility - Sky News https://t.co/6lT9Ho4zpW
292	Despite efforts to procure Covid vaccine, some nations will only vaccinate 20% of population https://t.co/xOnQar48X0
293	I've been a covid steward helping roll out the vaccine. Went really well 400 people vaccinated every day. No shifts for next week yet. Not sure when any more vaccine is arriving. All the crap you see on TV about how badly our government are doing. Is true. F@cking idiots?? https://t.co/pBDo92Bq9Y
294	I've been a covid steward helping roll out the vaccine. Went really well 400 people vaccinated every day. No shifts for next week yet. Not sure when any more vaccine is arriving. All the crap you see on TV about how badly our government are doing. Is true. F@cking idiots?? https://t.co/pBDo92Bq9Y
295	Doctors fear 'fake news' is causing Asian people to reject Covid vaccine over claims from subcontinent that the jabs contain alcohol or meat and can alter patients' DNA - as Imam warns slow uptake among Muslims could 'fan flames of Islamophobia' https://t.co/mIBICFz8wn
296	NEVER, ever had a better Text than “Grandpa’s vaccine is booked for next week” ???? https://t.co/Q95gPUiIqN
297	I am so ridiculously worried about how we're expecting people to continue following regs once they personally have been vaccinated / elderly relatives are vaccinated. Especially since 60+ reported self-isolation with Covid symptoms is already worse than younger gens ????? https://t.co/ratEfLphvH
298	Covid vaccine horror as 23 people suddenly DIE after taking Pfizer jab in Norway https://t.co/yzlxAbBq3C Sent via @updayUK
299	@WGHealthandCare @vaughangething Reports of coronavirus vaccines being thrown away under "rules from Welsh Government" at the vaccine hubs is shocking; offer the 2nd dose or open this to other frontline workers. Please issue a statement to stop vaccines being thrown away!
300	@AlexBerenson Also note that first dose protection maybe as low as 29.5% at the 95% confidence interval. In week 1 following the first dose you are probably at higher risk than without vaccine due to your immune system being "at work".
301	The way govt hurriedly released money 4 days before London court verdict proves someone in the govt was also benefitting from the money and getting their cut. We are talking about govt which forgot to procure lng, covid vaccines and pay plane lease but they didn’t forget this
302	AstraZeneca target 2 million doses a week as Covid vaccine passports ruled out https://t.co/yGNCU2eoLO
303	We have truly failed as a society if we let da government acc establish compulsory vaccine passports.
304	Covid vaccine horror as 23 people suddenly DIE after taking Pfizer jab in Norway https://t.co/hdltP5AUS8 Sent via @updayUK
305	Just heard a vicious rumour doing the rounds; Covid vaccine supplies will run out by the end of next week. Pfizer Chiefs are predicting a riot...
306	NHS heroes fear Government are using them as coronavirus vaccine 'guinea pigs' - Mirror Online https://t.co/NtooaZcoEF
307	My prediction after the government pushed back second dose of vaccine so more people can have the first one. They wont get enough supplies for second doses meaning starting over again for 1000s of people. They will definitely fuck it up and this seems the most obvious way.
308	It’s like they’re trying to follow the script of Contagion too much with this vaccine roll out
309	@JuliaHB1 what a plonker even speaking those words if the vaccine works we save people and get back to normal oh i know we should not do that as vaccinators will have to go home like the economy the likes of him have destroyed
310	@BorisJohnson one of the biggest mistake will be not giving second dose of COVID vaccination on time.
311	Getting my 1st Covid vaccine injection this week ?? I know it’s a sensitive subject but I’m going to have it done, had so much shit pumped into my system over the past 10 months I’m not sure another dose of something will do me much harm. Second one booked in for April. ??
312	Covid vaccine: WHO warns of 'catastrophic moral failure' - BBC News https://t.co/cuLi7ngiuE
313	Covid vaccine: WHO warns of 'catastrophic moral failure' https://t.co/0urbcUJNMX
314	Cybercriminals are attempting to scam the public by taking advantage of the COVID-19 vaccine roll-out @NCSC urges vigilance #CyberSecurity #InformationSecurity https://t.co/BpyS9H6KuR
315	Single Covid vaccine dose in Israel 'less effective than we thought' https://t.co/sxBa7yznjy Want to think again @CMO_England Chris Witty? You have gone against WHO advice and delayed the second Pfizer dose and here is the evidence of suboptimal immunity!
316	Single Covid vaccine dose in Israel 'less effective than we thought' https://t.co/jtolznU6ji
317	Single Covid vaccine dose in Israel 'less effective than we thought' https://t.co/9s3bWUH7PU
318	Tragic thought: How many more people will needlessly lose their lives as they think they are vaccinated but actually are not because this government decided not to give second doses so they can claim their 'world beating' record.
319	Quite worrying, especially now the U.K. government is enforcing a three month gap between vaccine doses 1 & 2, creating more time for the virus to mutate and new, antibody resistant strains to arise #COVID19 https://t.co/PToQJrcBhm
320	Covid vaccine free-for-all as rogue councils offer jab to staff before over-70s https://t.co/Rp2Xc0juyU
321	UK strategy to space out doses of coronavirus vaccines (in order to stretch supplies) does not offer adequate protection against coronavirus, data from Israel indicate https://t.co/2VZg1awfrK
322	My second dose of the vaccine was due tomorrow which has now been cancelled. I am still unsure on the delay and have tried to understand it but If vaccines doses are being destroyed rather than being given before 12 weeks that is an absolute disgrace.
323	@dyl_davidson They HAVE to scale back testing ... they will scale back deaths in the next few weeks to pretend the vaccine works
324	Covid: Pfizer vaccine first dose 'less effective than expected' | Daily Mail Online https://t.co/nNp9tD0eAZ
325	So if this vaccine dont work what actually happens to us please kus we cant live like this forever https://t.co/34Fa30mdcF
326	@FinancialTimes Pfizer was also a political move to ensure they capture the market before the cheaper Oxford vaccine is rolled out. How on earth can a high profile vaccine test end up with mistakes as they claimed for Oxford version when they first said it was less effective than Pfizer version.
327	If you are a man and don’t wipe after peeing, don’t worry about what’s in the vaccine
328	Seth Meyers blasts Trump's 'criminal' lack of coronavirus vaccine plan https://t.co/h0Epvr7FOt https://t.co/zuiwVzwDMI
329	@mrjamesob please please speak to NHS staff - the vaccine rollout isn’t as good as you think! The FIRST dose has been good - but second doses are being cancelled/delayed. It’s a misrepresentation to say the Tories are nailing this! https://t.co/fL6UocN4Wp
330	Outrageous ?? The Guardian: Foreign NHS workers could be denied Covid vaccine in England. https://t.co/S24VLlkRog via @GoogleNews
331	Hank Aaron dead within a week of having the vaccine https://t.co/mCRpggiPwZ
332	#vaccine #coronavirus Considering its maiming and killing people already ! This is distgusting and should not be allowed ?? Pfizer says its Covid vaccine trial for kids ages 12 to 15 is fully enrolled https://t.co/OOfLOlMISE
333	The UK stands alone again, much to its detriment. We're the only country gambling with our citizens' lives by recklessly widening the gap between each dose of the Covid-19 vaccine Doctors call for shorter gap between Pfizer Covid vaccine doses in UK https://t.co/juHo1zu5h8
334	Struggling to feel joy over the British boasting about all the people who are partially vaccinated when U.K. is the only one doing an off label approach ??
335	Shout out to my fellow needle-phobes enduring endless news footage of people getting vaccinated ?? it's happy news, and I'll definitely get the vaccine, but don't need to watch a dozen back to back vaccinations on a loop every day on TV ??
336	If you sit bare ass on public toilet seats, don’t worry about what’s in the vaccine
337	EU threatens to block Covid vaccine exports amid AstraZeneca shortfall https://t.co/yXSd468k7h
338	AstraZeneca says reports of 8% coronavirus vaccine efficacy in seniors are ‘incorrect’ - National | https://t.co/lZsna3arHE https://t.co/Qc6nuegrMe
339	@jonworth @willbott4 The fishiest part of this story - bracketing the 'AZ sold our vaccines abroad' parallel story - is that it cites *only* politicians and not a single epidemiologist, virologist or infectious disease physician.
340	@BorisJohnson my request to Hon PM to allow second dose of Covid 19 oxazenica vaccine within 3 weeks not 14 weeks interval otherwise the first dose will become ineffective according to scientific data
341	@BorisJohnson my request to Hon PM to allow second dose of Covid 19 oxazenica vaccine within 3 weeks not 14 weeks interval otherwise the first dose will become ineffective according to scientific data
342	Moderna says its COVID vaccine "should" work against U.K. and South Africa variants - CBS News https://t.co/Nx8zqqOhtV
343	Moderna says its COVID vaccine "should" work against U.K. and South Africa variants - CBS News https://t.co/Nx8zqqOhtV
344	If they do this, they might as well block exports of cars, wine and cheese. EU threatens to block exports of Pfizer Covid vaccine https://t.co/5t2ngmdVCZ
345	Missouri has the worst vaccination effort in the country. Well-connected people get vaccinated before vulnerable people. The term "public servant" seems to be an oxymoron. https://t.co/8AupTzGrca
346	@vonderleyen AZ #Covid vaccine delays in EU are down to you @vonderleyen and you alone Started with Brussels delaying contract by 3 months despite DE/FR/IT/NE having deal in place at the end of May Now your own EUropean Medicines Agency has not even approved it yet https://t.co/t7JP4hkUkK https://t.co/vO1Unl8Dub
347	AstraZeneca sued by pension fund over alleged Covid vaccine testing flaws https://t.co/ZbFxUpZOVY https://t.co/Zva3jWzH1n
348	AstraZeneca sued by pension fund over alleged Covid vaccine testing flaws https://t.co/yc28swjP5b via @Wealthstreamltd https://t.co/FkYxYjotXE
349	EU demands UK Covid vaccines from AstraZeneca to make up shortfall - https://t.co/Le0PAlRZgV via @FT
350	Inequalities in vaccine rollout to BAME communities may be from many factors, including majority white care homes being vaccinated first, cultural factors and urban health authorities having more people to treat than rural health authorities. Inequalities need addressing ASAP https://t.co/eBL6kK0uFq
351	EU demands UK Covid vaccines from AstraZeneca to make up shortfall https://t.co/mVpE7Z9GbW via @financialtimes
352	The EU is inward looking, isolated and has very little idea how the real world works. Its bungled COVID vaccine response is emblematic of an organization living in a fantasy land of its own design https://t.co/FhxawNnPgn
353	When this is all over and they have had the vaccine we should take our mum's down the pub and get them absolutely hammered, shots and everything like the good old days, roll out the barrel and all that.
354	She took covid vaccine a week ago....... She is from UK and a very real person.... God!!! ,???????? https://t.co/YU6tfQqceI
355	you people that wanna say it’s sus that the covid vaccine came out before a cure for cancer are really the dumbest people about. i’m embarazzed for you. the two literally can’t be compared pls educate yourself before speaking pls i’m tired of dumbing shit down for you ??
356	AstraZeneca may have to renegotiate Covid vaccine contracts, warn experts https://t.co/wjhhIAJCmt
357	the fact a covid vaccine was developed in 9 months but a hiv vaccine hasn’t been developed in 40 years is institutionalised homophobia
358	I continue to be devastated and bereft by brexit, but the EU’s attitude is morally wrong and will lead to the most rancid English media headlines. EU could block millions of Covid vaccine doses from entering UK https://t.co/I8VvqQuFKr
359	@AnonaGotta I think vaccinating older people is meant to help more with hospital capacity and deaths than transmission... I don't know what percentage we'd have to vaccinate for cases to go down ??
360	Dear Residents, Please be aware of Covid Vaccine scammers who will call residents and offer them Covid Vaccine for a fee. Please follow the Government guidelines, and avoid being scammed. Stay safe and stay alert.
361	Having been busy all day, I didn't see the EMA approved the AZ vaccine. Hopefully, despite Macron's nonsense, my aunt will get a jab relatively soon. What a mess.
362	Lol that awkward moment when you get invited to participate in a COVID vaccine trial because your dumb ass accidentally signed up over the summer
363	Older age groups in UK ‘will die’ if Covid vaccine priority goes to younger key workers https://t.co/oornuPH8pB
364	She told Reuters the development of coronavirus vaccines had been rushed by big pharmaceutical firms and might do more harm than good, with too many unanswered questions about potential side-effects and their efficacy against new variants #covid #pfizer https://t.co/ALFTBmysEG
365	France and Germany mull sanctions on vaccine providers as EU row over delays escalates https://t.co/7bfAUc3nfF - Dear God. AZ is supplying these vaccines at COST PRICE and these bastards still take issue!
366	If antibody levels are this high, yet we are still seeing so many “cases” surely this is now just endemic? The vaccines don’t prevent you getting or transmitting so what’s the point of vaccine passports when vaccination rates are touching 90% https://t.co/3NwDRxITBv
367	Dumbest tweet so far this year. Here’s someone who doesn’t understand: - Countries with bigger populations can vaccinate more people per day. - Vaccinating one country at a time would not be possible. - Vaccinating one country at a time would not be a good idea. https://t.co/GNBVMwaxfd
368	All these gammons saying that president of the EU should resign over the vaccine thing and yet are perfectly happy with Boris and our 100,000+ deaths
369	Half of care home staff at UK's largest provider have not had Covid vaccine. The comms that providers needed to access shouldn’t have been as hard for them to find as it was. Much of this low uptake was preventable https://t.co/F3xBUpLLqa
370	Absolute bullshit.. Pakistan well I. Line to receive COVID vaccine. First batch already received https://t.co/7LA1iBL0k5
371	All they wanted to do was roll out the vaccine as quick as possible, so they could shamelessly brag about how many more people have been ‘vaccinated’ here than any other country in Europe. They should’ve always followed manufacturers instructions, this could all go very wrong. https://t.co/noL98afLKm
372	I've just been offered the vaccine I've just been offered the vaccine I've just been offered the vaccine I've just been offered the vaccine I've just been offered the vaccine I've just been offered the vaccine I've just been offered the vacc (cause of the volunteering work I do)
373	UK govt and EU are having a heated room because of Vaccine shortage but Femi is in Nigeria selling Vacicne for N70,000 ?? Nigerians are too naive for people who claim to be so smart.
374	Emmanuel Macron is only following footsteps of Angela Merkel Man has no idea of himself. An absolute pathetic leader. BBC News - Covid: France restricts AstraZeneca vaccine to under-65s https://t.co/mr651fXrn7
375	@Reaproy Myanmar Military acts are a total disgrace. Second covid vaccine delivering flight was not allowed to land today.... And current remaining vaccines have been unlawfully taken away from the public. No word can describe for this injustice.
376	@Pete4PM @Steven_Swinford Vaccines have to be opt-in, it'd be fundamentally illiberal to force people into having one and worse it'd be counterproductive. I just find it such a shame that this miracle of science made possible through international co-operation is rejected by many for such crap reasons.
377	Is there any 'whatsapp-able' helpful covid vaccine videos/pictures I can flush around the African aunties chats. Seeing so much randomness floating around.
378	Nasal sprays, room temperature vaccines, cheaper products and tackling the variants: the second wave of Covid vaccines https://t.co/nBG7t9Q2tz @TelGlobalHealth
379	@AugmanJR The U.K. is doing a really good job of rolling out the vaccine but the testing situation was awful. The failings have led to untold issues that will take yrs to realise.
380	German minister criticises Von der Leyen over Covid vaccines 'disgrace' https://t.co/tTJyPgzhJq
381	Report: EU vaccine roll-out was 'shit', German minister said https://t.co/yiufAkUUZp
382	Let me go and get myself an allotment so i can start growing some beans and carrots, coz soon they're gona say no vaccine passport no supermarket entry.
383	People complaining about the vaccine passport and getting into nightclubs are the same people buying bags of god knows what off randomers. You lot have weird morals
384	Vaccine passports is the right thing to do and should be compulsory for care workers to, GB news with NF has just stepped up to the plate eventually, with an un bias leftie view ?? https://t.co/uoOAd5SwTP
385	@SamTubman you’ve been taking things far worse than the vaccine mate https://t.co/Wy8n7t8PIM
386	One of the possible side effects of the covid vaccine is "feeling tired". Lol, no, that's a side effect of being alive.
387	The side effects of the covid vaccine have hit me hard man,shaking uncontrollably,sweating profusely,a mad headache/migraine,a temperature of like 39/40 and vomiting,it’s been maud.
388	COVID vaccines largely unwanted at first, slowed EU talks: report https://t.co/eehzndOR1r
389	@BristOliver Problem is they're mostly the ineffective AZ vaccine, shown to be almost entirely ineffective against the SA variant. Woops....
390	Am I missing something? It seems to me that everyone (including Sarah Gilbert) is avoiding answering the question as to whether the Oxford/AZ vaccine is sufficiently effective amongst the over 65s. They should come clean
391	@paulrey99 @JGForsyth Fair point on the vaccine passports, however I don’t see any other option if we want to be able to travel.Thankfully vaccine passports are dead domestically.I always liked Gove but his true instincts have been exposed by this crisis and they are authoritarian,not far off Sturgeon
392	This Covid vaccine has got me so fucked up, the side effects are mad ??????
393	AstraZeneca’s Vaccine Does Not Work Well Against Virus Variant in South Africa https://t.co/Rme9RWiDmk
394	Over 80s Covid deaths still increasing after vaccine roll out https://t.co/z5DbIFntNW
395	There is a worrying thing with regards over 70's, its coming up for 2 months & still not complete. We can't stay at home like this, with those in their 60"s & 50 needing the Vaccine all of which generally in work. The Govt needs to get this done & it needs to be done by mid April
396	Interesting to hear so many people comment on the South African trial of the Oxford/AZ vaccine as a “small trial”. It had ~2000 patients! Wonder how many from the commentariat have tried recruiting to RCTs ???
397	@john_mcguirk Official Ireland has always been well behind the curve internationally in healthcare & organisational goverence. Between the farcical banking bailout and unnecessary financial austerity people still gullibly believe the spin that roll out of vaccines will be completed promptly.
398	I litetally cant wait to feel that sweet covid vaccine needle deep inside of my arm :(
399	They insist on telling us how many people are vaccinated when all we care about is when we can get our lives back ffs.
400	QAnon conspiracy theory claims COVID vaccines will turn you gay or trans https://t.co/3jJ8OUKqXo https://t.co/fyw1nNCX8n
401	Criminalised for vaccinating people, this world is a mad place https://t.co/jR5kiV37xf
402	Had my first covid vaccine and these side effects are horrible. Literally just want to sleep but instead im awake being sick ???????
403	people quoting this saying the woman ignorant..that has to be the most laughable thing I have seen for the morning.. ignorance is a lack of knowledge and the makers of the vaccine are ignorant as to what could arise when one is ready to get pregnant ..y'all talk too fast on here https://t.co/0Y7YUtmSAq
404	@NoToVaccPass Bring in vaccine passports ASAP! No freedom for cowardly anti vaxxers !! No travel no entry ??
405	Lack of Covid data may leave African countries behind in vaccine rush https://t.co/OesBaNuIC5
406	Government accused of introducing ID cards ‘by stealth’ as ministers sign renewable vaccine passport contract https://t.co/HKIgpqHDv9
407	Exclusive: UK vaccine passport plans to be scrapped https://t.co/pMcyh9fYx0
408	Also, it sounds like if they do go ahead with these "vaccine passports", then all of the young people will be stuck in the country as they will be the last to get vaccinated ?? https://t.co/Ludzz5QN5q
409	Remember all those people refusing a vaccine passport because of ‘Liberty’ or some such bollocks and then telling everyone about it via their smartphone... https://t.co/1MVwIYSkJo
410	@LiamL72_ Same in England mate it’s absolute shite. Not much to look forward too at all. Seems like this shite is being dragged out throughout the summer despite having the vaccine.
411	Unpaid carers qualify within Priority Group 6 for the COVID vaccine - but as I discovered myself yesterday not all GP's are aware of this or are honouring it. @CarersUK provide template letters on their website for use with your GP if this is the case. #unpaidcarers #vaccine https://t.co/rYi45AJ9pm
412	I was invited for a covid vaccine because the NHS thought I was 6cm tall - Liverpool Echo https://t.co/CHs6gZHmX1
413	@Crypto_Sisters @davidgokhshtein @Nevergi79965302 What a stupid reason to dump it ?? vaccine passports will happen sooner or later, countries will require you to have one to enter, along with nightclubs and other social venues, why not be part of the project that will be at the forefront of the technology, BULLISH
414	This is the problem when the Duterte administration politicised vaccination because of the "supposed Dengvaxia brouhaha" just to get even with the previous administration. Now, the PH is lagging behind in ASEAN in the COVID vaccine rollout. It is so stupid. https://t.co/jHswOhroLe
415	Researchers urge delay in administering Pfizer vaccine's second dose, cite strong data https://t.co/UWkzXZURiO
416	@amitkohli1976 @Ella32823623 Spot on variants and vaccine passports are the threat to pushing this vaccine, it all started off for the old and vulnerable and protecting the nhs, now cancer and heart trouble have taken over, this covid charade is a smoke screen.
417	Just seen a couple of dodgy blokes down the market selling Covid vaccines, £2 each or 3 for a Pfizer.
418	The only way for all industry to get back to normal would be for the UK government to now open up the vaccination drive to as many people as possible who don't hv an issue with a?? less 10% is around 7million of the UK population, heck even vaccinating 50%... #publichealthmatters https://t.co/AcrA2JqACy
419	EU manages to compound its Covid problems as citizens refuse AZ vaccine following Macron and Merkel’s lies over its efficacy. Unbelievable mishandling of the crisis makes “organising a pissup in a brewery” an understated comparison for those two clowns.
420	Getting the AstraZeneca COVID vaccine in a few minutes?? never heard of this one
421	The COVID vaccine side effects are no joke, feel like I’ve been in a car wreck.
422	Okay so, my AZ vaccine side effects arrived just as I was going to bed ?? I really had hoped I’d be one of the lucky ones, but I feel how hot my skin is, the migraine headache is ouch and I haven’t slept at all. That and my arm, as always, hurts like a birch. Typical!
423	Send them to jail for a month. Women disguised themselves as old ladies in bid to cheat Covid vaccine waitlist https://t.co/a0m8M7LbvO
424	"you want an antiviral vaccine to do 2 things, 1st reduce the likelihood you will get severely ill & go to the hospital & 2 prevent infection” Yet the current phase III trials are not actually set up to prove either https://t.co/V9NYHeBsUy
425	Tbh if I were ever to take a covid vaccine it would be whatever the Israelis are taking they deff wouldn’t kill off their own people https://t.co/HkHRicw6vX
426	Wild that so many people who have the reassurance of WFH for the foreseeable future would take time out of their day to come on here and argue why I don't deserve to be vaccinated before being catapulted back into a small room with 32 other people but here we are.
427	NIMBYs are still NIMBYing ?? France still doing a racism and pretending it's laïcité ?? EU/France gone from threatening to steal AZ vaccine to saying it doesn't work and people shouldn't take it. ?????
428	@AnnLinde #china is using every means to tighten control over #Hongkongers that citizens cannot express any opinion against #CCP ‘s views! Not only for politics, but also daily life! E.g. questioning 50%-effective China COVID vaccine is condemned by #hongkong gov ??
429	Taking a vaccine just so things can get ‘back to normal’ is an absolutely scandalous thought program
430	@Iloveautumn2 @IngramGlynis Tell me about it, my mother lives in Romania and they're under the impression that 17k people have been given immunization via vaccine. When I told her that people here had only one vaccine she was "but the UK PM said so, he's reported that they've been vaccinated" ??????
431	@PolaBear2637 @brondbyste I agree with you on that I don't think I will be going out that week because it will be pandemonium. I have no idea why people working in hospitality or retail aren't being prioritised for the vaccine to deal with that surge.
432	It is just a mask, there is no such thing as Great Reset, vaccine passport are conspiracy theories... sigh ?? https://t.co/UpnB4grlcG
433	@SkyNews even if he said this people are still not listening to any rules so u go out & protest about the vaccine passports with 100s of PPL None of them wearing a face cover your face has been noted & u are to blame for the virus spreading hope your bosses see your faces & gets rid of u
434	Lebanese lawmakers violate coronavirus vaccine rollout plan #????_????? https://t.co/3AUgUAsnp3
435	@pennyarnie @MetPoliceEvents People were protesting about Government sleaze & vaccine passports.... BBC & SKY are misrepresenting what happened, crazy anti mask are always going to be around(a very small minority today)
436	@HuffPost if you can get a vaccine passport then you can get voter identification, please no!
437	Covid vaccine wiped me out today. The side effects have been RANCID
438	expecting the 'liberal' reaction to this to be a screeching u turn on the notion of vaccine passports because bannon thinks they're bad https://t.co/LjWWzev47k
439	@talkRADIO Howard calls in all the time and talks up the vaccine passport idea, and is fundamentally wrong and sounds like he works for the Government to get the northerners and septuagenarians on board #buggeroffHoward
440	@Fox_Claire I’m not a fan of national sheep training ( aka football ) but vaccine passports are just another bungle during the great covid over reaction
441	Had a covid vaccine on my arm but my leg is hurting ?????????
442	@JuliaHB1 Guido’s headline is hyperbolic, and the content in the article contradicts the headline AM states that (1) the AZ vaccine is safe and (2) German’s have no say in what vaccine they get due to scarcity. The EU will have scarcity concerns for a while. You’re creating faux outrage https://t.co/pmLg1E3I87
443	Making a vaccine passport is ridiculous taking into account many people still contracted Covid after taking the full vaccine
444	Why are these Eton types interfering in the normal lives of us working class by wanting "vaccine passports" to go to the football etc... why done people like you @BorisJohnson @MattHancock just butt out
445	Vaccine booked??????
446	It's been hard these past weeks adjusting to the reality of having no prioritisation for the vaccine when I thought I'd be group 6. Millions living with asthma know how badly a chest infection and even a cold can really bring you down - let alone threat of pneumonia from Covid.
447	Not a good look and not a good public health policy. What a missed opportunity. Hopefully government will hold Netanyahu to account? Israel to use excess Covid vaccines for international diplomacy https://t.co/8trJybyIWv
448	@TheLastLeg People comparing this covid vaccine certificate for a product that has no long term safety data and a 99% recovery with well tested vaccines and driving licences are shockingly stupid. Excuse my french. #VaccineCertificateNo
449	my little sister got her vaccine today and the first thing she asks if she can go and eat McDonalds now pls ????
450	'Real disappointment' over uptake of Covid vaccine among care home staff https://t.co/n79scYMWVY
451	My arm is super achy from the covid vaccine. Word of warning be prepared to not use your entire arm for the whole day.
452	@MarkStoval The pharmaceutical companies were pushed by governments to get the vaccine out quickly and clearly weren’t comfortable with that unless their liability was waived. AstraZeneca are not even making a profit on covid vaccines, so they have zero risk appetite, understandably.
453	@SandraWeeden Oxford vax is shockingly bad, the one many Brits were longing to take because it was apparently British and not an mRNA type. Don't forget this is just for those that have reported https://t.co/HPHAgkpPji have more chance of dying from vaccines than covid.
454	#MeanwhileInRussia the Covid vaccine programme is not going too well. The Oxford, AstraZeneca jab is the only one on offer and Russians don’t wanna turn English
455	Getting my covid vaccine injection on Thursday afternoon https://t.co/EDqYZFcCBB
456	@thenewstuff1 @MartynChilvers @LozzaFox The fact that I had a really bad reaction to Naproxen and an ambulance was called is not a good start. The thought of having an unknown vaccine put in my body frightens the life out of me. What if i die this time????????
457	South Africa probably jumped the gun by abandoning that trial and its AZ vaccines. Given that it’d be really surprising for efficacy vs SA to be extremely low, you’d definitely want more data first before chucking it out the window
458	And today I will be playing COVID vaccine hokey-cokey. Gone from yes, come in to no, not eligible, to yes, you’re eligible and now back to no. ????????????
459	Easier getting a COVID vaccine that an Eastern Electrics ticket
460	@Geoff61440831 @DarrenPlymouth It all about tax payers money going to big pharma, billions & billions, of which MP's and elites hold stocks. It's a fucking shit show. The only thing our Gov has excelled at: Marketing fear Marketing vaccines They've been piss poor on all other fronts.
461	From housing to vaccine passports, politicians act as if young people don't exist | @zoesqwilliams https://t.co/tofZghS4Pf
462	Second jab covid vaccine today?. This one has put alot of my colleagues out of action?? so we will see how it goes
463	If you ate from that buffet don’t worry about the vaccine https://t.co/ow6fJnAOTK
464	Mainstream media doing all they can to force people into having vaccines well quess what we do our own research nowdays https://t.co/d0xeOPpXxg
465	I had the AstraZeneca Covid vaccine at 12:40pm. I came home at 13:00 hours with slight numbness with my hand and cold arm sensation. I took 2 paracetomals to ease the sore muscle pain. It is almost 15:00 hours and my arm is now feeling normal?
466	WHO chief: waive Covid vaccine patents - I am not sure about war footing metaphor but otherwise agree https://t.co/utvaGZivIo
467	WHO chief: waive Covid vaccine patents to put world on 'war footing' https://t.co/94lRIJib0d
468	Coronavirus vaccine side effects: Bell's palsy listed as a possible side effect https://t.co/HMSl4XGkuv
469	The injustice when my perfectly healthy fiancé was invited for his Covid vaccine today but me with an autoimmune disease and weakened immune system has heard absolutely nothing :’)))
470	God the side effects of the covid vaccine are brutal
471	It’s been 24 hours since I had my covid vaccine and I’m still really ill with temperature and headaches. ?? #AstraZeneca #Vaccine
472	First dose of the covid vaccine and feel like I'm dying. Shaking heart hurts body ache feel so tired...Ear ache head ache pain in my neck and spine.
473	@RevRichardColes I had the Pfizer jab and felt nausea and a headache the next day and day after incredibly tired these side effects past within 4 days if that’s what we have to contend with is happily have my second dose and more to protect my self and others from covid
474	the vaccine side effects are worse than actual covid ????
475	So much ££$$$ has gone into Media propagander trying to convince us that it's safe, but is it really? These scientists were not so sure ?? Researchers rush to test coronavirus vaccine in people without knowing how well it works in animals https://t.co/dd3KyTthUt via @statnews
476	Been asking this question for the longest but no one’s taking me seriously! Since the Queen took the vaccine for covid she ghosted! Like where or what tf is wrong with her? For Philip he’s already in the hospital! Feeling Sick? get quinine or drink tea with lime n honey n ginger
477	In may there where 5000 cases and 1000 deaths, now there are 5000 cases and 64 deaths, vaccines work ppl
478	So now the EU is telling lies that the UK has banned the export of COVID vaccine. This is a total lie and the UK are doing no such thing. The anti UK bullshit being spouted by the EU is absolutely disgraceful. Time to stop buying any EU products
479	The country is going to shit, children are starving, people are desperate to get vaccinated and they're worrying about Britney! I love Brit but surely they got their priorities are bit wrong here! https://t.co/3Nz0PfyO3X https://t.co/c4q55OTVgN
480	@DaveKeating It just goes to show how badly the EU screwed up vaccine procurement. If they did not play silly buggers, they would not be facing the problems they are today. And their residents would not be refusing the AZ vaccine due to Macrons lies.
481	From housing to vaccine passports, politicians act as if young people don't exist | Zoe Williams https://t.co/cAM8SANl1h
482	Pensioner found dead after she missed Covid vaccine 'may have died 12 years ago' https://t.co/YOJ4bAESG3
483	@GhostofOkello Some of you are annoyingly consistent in embarrassing Nigeria with your takes. WS is the reason for skin bleaching, why Nigeria is only just getting the Covid vaccine, why you speak English & other Nigerian languages will soon die off, why SARS is ongoing etc. Educate yourself.
484	He can’t possibly be taking full credit for the vaccines rolling out ?? https://t.co/zUoV5amlEA
485	Denmark suspends use of AstraZeneca Covid vaccine over reports of blood clots https://t.co/GLTIRMvbCL
486	This COVID vaccine has finished me ???????
487	We need Dr chopper on this COVID vaccine
488	Having a really nasty fever after taking the coronavirus vaccine and now I know how my laptop feels every time it gets a windows update
489	I would rather be in grave than having the vaccine of the satanist elites inoculated into me #BrexitDisaster
490	Baby.... these covid vaccine side effects have me in a choke hold!!! How am I shivering but boiling at the same time :’(
491	Representatives for the U.S. wished countries wanting to quickly make Covid vaccines that they cannot buy would bear in mind the importance of incentives for innovation https://t.co/fCeQVWZsV4 https://t.co/A1CAjKznBQ
492	If the vaccine won’t cure you of COVID or keep you from getting it then what is it doing?? #NoThanks
493	These drug companies are using the population as lab rats AstraZeneca Covid vaccine now suspended in Netherlands as Oxford scientists say ‘no link’ to blood clots https://t.co/7XKFokyn0t
494	Struggling to understand this issue with AZ vaccine even after reading up this am. AZ say reaction to vaccine not higher than incidence of thrombosis and pulmonary embolism in general population. So what's the deal? Uncertainty not great at times like these.
495	Top EU nations seem to be not considering this: casting doubt on the AZ vaccine (which, full disclosure, I’ve had) could effectively undermine faith in the whole Covid vaccine initiative on the continent
496	Top EU nations seem to be not considering this: casting doubt on the AZ vaccine (which, full disclosure, I’ve had) could effectively undermine faith in the whole Covid vaccine initiative on the continent
497	Chaos in EU over AstraZeneca Covid vaccine concerns https://t.co/tj3YXkCgGg
498	When AstraZeneca decided to make its Covid vaccine available at cost, the marketing team must have thought: "Ah well, no profit, but at least it'll be a PR coup"
499	@pziegler1986 @Dr_Tad AZ does appear to be singled out more than the other vaccines as risky. I don’t think there is anything co-ordinated, but the usual mixture of COI amongst scientists, and politicians caught in a cycle of ass-covering and follow the leader.
500	@Dilfite Not having a Covid vaccine must be so unbelievably embarrassing I would just have to self-isolate
501	@Dilfite Not having a Covid vaccine must be so unbelievably embarrassing I would just have to self-isolate
502	The AstraZeneca vaccine roll out to be halted after a study showed 12 people out of 22 million suffered a stubbed toe a week after the jab.
503	If you're over 50, you can book a vaccine without a doctor's note or text https://t.co/pkBcH7P7hG
504	Not partially vaccinated people thinking it’s okay to mingle and prolonging lockdown for the rest of us who have to wait to get it ??
505	@Number10press Vaccine passports will discriminate against the young - who are precisely the people most wanting to shop and to go out. ?????? https://t.co/9P0XQeI8gK
506	Last I heard from an Israeli, the young people in Israel refused it in droves, so if true these lot probably aren’t vaccinated https://t.co/pOc3Ot4vIc
507	Covid vaccine ?? + SEX ??????=BAD IDEA I almost past away ???????????
508	European regulator says AstraZeneca’s coronavirus vaccine is ‘safe and effective,’ but link to rare blood clots cannot be ruled out
509	The EU are craxy.. they stopped the #AstraZeneca #covid vaccine roll out for a few days..imagine how many people could die as a result of this.
510	@BorisJohnson Boris. Your just lost the next election with this crazy testing and vaccine passport rubbish ??????
511	@SteveDunne France already had a lot of vaccine scepticism pre Covid and this really isn’t helping.
512	Ok today has been a down and ranting day but I'm focusing on the positives, I've got my 2nd vaccine booked for next Friday and the hairdressers booked for the day they open. So I'm going to try to care about @SpursOfficial as little as they obviously care about us as fans
513	Finland suspends AstraZeneca Covid vaccine a day AFTER EU admits it's safe https://t.co/UAYKyC43sG
514	No side effects after my AZ vaccine today
515	Boris Johnson receives AstraZeneca Covid vaccine - 'I cannot recommend it too highly' https://t.co/Mgzg8zY5wq
516	Boris Johnson receives AstraZeneca Covid vaccine - 'I cannot recommend it too highly'' | via @telegraph https://t.co/GS0KHvS6Yy
517	@steamedhamms Delaying the census is not great because it means working with decade-old data to plan the Covid response (incl. vaccine roll-out) among other things, but rerunning these questions soon (or better yet moving to a more frequent schedule) is def warranted.
518	@steamedhamms Delaying the census is not great because it means working with decade-old data to plan the Covid response (incl. vaccine roll-out) among other things, but rerunning these questions soon (or better yet moving to a more frequent schedule) is def warranted.
519	@Forbes It doesn't work anyway according to you. The relentless briefing against this vaccine has been disgraceful and surely aimed at helping the profits of US big pharma. How dare OX/AZ make a non profit vaccine https://t.co/kPAJyu5ehG
520	@tom_nuttall I will never understand this as long as I live. We’re in a pandemic, so refusing to use the AZ vaccine because [fill in multiple hysterical reasons why not] is like a drowning man objecting to grabbing a life belt because he doesn’t like the colour.
521	Who want to inject COVID 19 vaccine made in China ?? Few older died after injection but the government denied its relationship! Just only said that the older have many diseases , no need to give 3 million compensation ?? 3 million dollar for one life ??
522	This #thirdwave business is laughable. If over 2 million people in the UK have been vaccinated so far and it’s supposed to help with “the spread” what’s the problem... ?? Am I missing something
523	@DeanMacMathgham @AP AZ vaccine makes no profit during the course of the pandemic. Not for profit
524	covid vaccine today. Feeling gross right now, it's been about 7 hours. Started feeling headachy but that's usual for me but then got very zoned out and I tried doing online test but glared at the first page for 20 minutes. Now I'm shivering and in bed with hot water bottle
525	In a capitalist world is it surprising that the vaccine that seems to be having the worst press and the most difficulty is the not for profit one or am I just being overly paranoid ????
526	@UKCovid19Stats Why are there still more deaths in the 80+ age group than any other, given this most vulnerable group was vaccinated first? There is a clear inconsistency here, either the vaccine does not work, or COVID is not the cause of their death.
527	Reminder that the AZ vaccine was developed at a publicly-funded UK university and is being sold by its producer at cost... https://t.co/oAmLqkTQs1
528	“At least 85 poor countries will not have significant access to covid vaccines before 2023.This will cause an estimated 2.5 million avoidable deaths. As the WHO Director-General said:“the world is at the brink of a catastrophic moral failure.”” The UK is playing a part in this ?? https://t.co/y5KkBjXhCV
529	What a disgusting comment to make. Europe’s highest death toll, millions on furlough worrying about their future & AZ developed vaccine not-for-profit. The only #greed I can see has come from Tory donor cronies, profiting off the back of PPE shortages https://t.co/Kon9uJUCDA
530	WE DON’T F**KING CARE IF YOU’RE NOT HAVING THE VACCINE ?????? #BoreOff https://t.co/jK528VyuZ4
531	@nothing_human Agree and are vaccine passports such a bad idea...if we have to get back to sanity
532	Capitalism and greed bringing us the Covid vaccine is like being rescued by the guy who pushed you in the sea
533	EU planning tougher Covid vaccine export controls https://t.co/tTnTWjToh9
534	If we had things to be proud about I’d be all for it, but let’s face it that’s not gonna happen anytime soon. The only good thing that’s happened recently is the vaccine rollout but that’s not something to be proud about if you look into how we succeeded with that...
535	Top tip: don’t get the covid vaccine in the arm you sleep on ??????
536	@Telegraph Any pub stupid enough to serve you @BorisJohnson next week deserves to be in the vaccine passport trial. Pubs and restaurants should ban everyone connected with this tyranny until normal life us restored.
537	Young people have suffered enough in lockdowns to help protect the elderly when the virus doesn't really affect them. To now punish them by saying pubs can check if you've been vaccinated (or negative test) when young people can't even get a vaccine yet is horrendous.
538	@NHS please could you send me a dm, regarding covid vaccine
539	I have received 2 messages regarding COVID vaccine but with all the scammers I can’t even be sure if this is valid ??
540	AstraZeneca lost £21bn in profit by selling Covid vaccine at cost https://t.co/9Pw3zUe3bn @MailOnline
541	Vaccine passports can fuck off simples I’m not bothered if I never travel again corrupt bar stewards !!
542	@davidschneider South African variant together with Bresilian variant represents 4.7% of French cases (65% of French cases are due to the British variant). The AZ vaccine is less efficient on the SA variant. Not inefficient. Beware retweeting incorrect information to this scale.
543	Being told a vaccine works so people can fly to find out there’s a £5k fine if you do https://t.co/Jdvnqke0XW
544	Never felt this fucked in my life Covid vaccine defo has aids in it
545	TBH i’d rather a vaccine passport than having to deep throat a cotton bud every time i want to go to the pub ??
546	Only in Germany: The vaccine roll-out in Germany has descended into chaos as it emerged that 80-year-olds have to fill in ten forms just to get the jab.
547	Having a passport for a vaccine that doesn't stop the transmission is like having a passport without your name and picture in it. Actually, having a passport for a vaccine in general is a dumb idea and everyone should oppose that - this is not returning to normal.
548	@JamesMelville James I’ve disagreed with just about every point you’ve argued about the pandemic so far but, on vaccine passports, I whole heartedly agree with you, they’re a bloody awful idea
549	This covid vaccine has knocked me for six! ?? been awake since 2am ?????
550	Fake COVID vaccine distribution network dismantled after INTERPOL alert https://t.co/Efw4ZzAGXp
551	Woman suffered convulsions after taking Pfizer COVID vaccine #lockdown2021 #sundaymotivation #palmsunday https://t.co/cbXKAbclc5
552	APPARENTLY because other people have behaved like twats about vaccines I must be lumped in with them despite not giving a shit about whether other people are vaccinated or not. Sounds reasonable.
553	I’m getting my Covid vaccine tomorrow however, I’m scared it’ll affect fertility ??
554	Wish I was joking when I’m saying I genuinely can’t work out if I’m having side effects from the vaccine or sunstroke from the one day of sun we’ve had
555	Because they want you to believe the vaccine is working ?? https://t.co/ZS8L3lF5t4
556	@priyankac19 You all questioned the roll out of vaccines by this current government and how come so desperate to have the same injected ..... hypocrite.
557	Canada suspends use of AstraZeneca Covid vaccine for those under 55 https://t.co/FaTD346sfg
558	I’ve had the vaccine but vaccine passports are some new world order type shit ngl. I can’t believe this is happening + the gov is trying to remove our right to protest
559	At the start of February, I was told my Pharmacy would be in charge of delivering 1000 COVID vaccines a week. Initially I was SHOOK! Especially being qualified for less than 2 years ?? Today, we have SAFELY administered nearly 10,000 vaccines ?? ?? #CovidVaccine #AstraZeneca https://t.co/6cLUYny97z
560	@Alistair_King @13sarahmurphy Well considering they did absolutely nothing to protect the public, the only thing they knew they had to get right was the vaccine program
561	@DHSCgovuk And the new advice is what? Bend over backwards and kiss your a**e goodbye? Because the vaccines don't work or don't work very well for the CEV, especially just one dose.
562	@stu_the Nah not buying that. The argument for vaccine passports to go to the pub makes no sense anyway. If you’ve had the jab what the heck are you worried about anyone else for? And yes you can still catch Covid.
563	Please Miss, what’s the point in having vaccine passports if you can still in theory contract the virus after you’re vaccinated? In other words, this whole shit show appears to be more about gathering an individual’s information, than it does a vaccine.
564	@BorisJohnson Make vaccine passports compulsory for everything, that way, all the conspiracy theory idiots and anti vax muppets, will have to stay at home forever
565	@Rachael_Swindon Pfizer are frauds and liars! Kids should not be taking the covid vaccine! This is disgusting!
566	Petition: Do not rollout Covid-19 vaccine passports https://t.co/56dQMu5W0e
567	I really wish they'd stop using the term vaccine passports because vaccine passports are a thing and that is not the same thing as this thing.
568	@PoliticsForAlI @DailyMailUK Vaccine passports are illogical. If 10 unvaccinated people enter a pub, and the other 90 are vaccinated, the chance of transmission is so low as to be negligible, and vaccinated people are so well protected, why would they care about those who knowingly take the risk?
569	Having a vaccine passport for eating out and theatre trips is great , but when my husband hasn’t had his who am i going to these places with ffs, and all the younger people havent ? And for the record a friend has just had covid rather bad AFTER having her Pfizer vaccine’s ?????????
570	4 ways Australia's COVID vaccine rollout has been bungled - wrong a) pace, b)phasing, c) model , d) messaging via @TC_Africa https://t.co/5BD9YWI4z7
571	Apparently being anti domestic vaccine passport means I’m now a covid denier. Please can someone actually come and end my life because I cannot continue living on this stupid planet with so many stupid humans
572	Two problems with vaccine passports: - there are good reasons why some people will not have been vaccinated against Covid - it seems odd to insist on vaccine passports for Covid and not other, easily transmissable viruses
573	After her Corbynite whitewash of antiSemitism hard to have any respect for Baroness Chakrabti's opposition to vaccine passports in name of civil liberties.
574	Destroyed his own argument for vaccine passports... https://t.co/nCTh6ib8nm
575	humans made a vaccine for covid in such an impressive time so why can’t they make a printer that doesn’t have a nervous breakdown every 6 minutes
576	Anyone concerned about vaccine passports must be reassured by this governments record of complete failure on everything it has tried to do regarding covid. The only thing that has worked is the vaccination programe - thanks to the NHS.
577	@bmg_val @ReeceMUnitedV7 Saying that the Covid vaccine is highly experimental and unnecessary is a well informed "conspiracy theory", not so much throwing shit at a wall
578	Two problems with vaccine passports: - there are good reasons why some people will not have been vaccinated against Covid - it seems odd to insist on vaccine passports for Covid and not other, easily transmissable viruses
579	Two problems with vaccine passports: - there are good reasons why some people will not have been vaccinated against Covid - it seems odd to insist on vaccine passports for Covid and not other, easily transmissable viruses
580	@DonaldJTrumpJr Voter ID is racist because it disproportionately targets minorities. Vaccine passports don’t. I didn’t even have to explain this to my 9 year old nephew. ??
581	Apparently being anti domestic vaccine passport means I’m now a covid denier. Please can someone actually come and end my life because I cannot continue living on this stupid planet with so many stupid humans
582	Honestly, vaccine passports are something from a dystopian nightmare. They should never be allowed to see the light of day. Do not accept this to get your freedom back. Slipper slope...
583	Any form of vaccine passport is frankly disgraceful against a younger generation who have sacrificed just as much as all the other age groups.
584	I really wish they'd stop using the term vaccine passports because vaccine passports are a thing and that is not the same thing as this thing.
585	“vaccine passports are a total affront to privacy. They run the risk of creating a discriminatory, two-tiered society – and we don’t even need them. As one journalist put it, they are the answer to a problem that doesn’t exist” https://t.co/KTOtgDnO1j
586	If you need a vaccine passport, it’s not a social or civic “freedom” https://t.co/iWgjyTjNCx
587	Please Miss, what’s the point in having vaccine passports if you can still in theory contract the virus after you’re vaccinated? In other words, this whole shit show appears to be more about gathering an individual’s information, than it does a vaccine.
588	Unless there is a vaccine that makes a person immune to all strains of Coronavirus a #CovidPassport is an incredibly stupid idea, more wastage of tax payers money in an already disabled economy. If you can still catch/spread covid, this passport makes zero sense (cont)
589	Vaccine passports would be "unworkable" for UK clubs, the Night Time Industries Association has said https://t.co/qdk7Z7YEZu https://t.co/u6vgzDIsp9
590	My mother is having bad side effects to the vaccine. She is severe pain.
591	Stick your vaccine passport up your arse cnut @BorisJohnson
592	Having a passport for a vaccine that doesn't stop the transmission is like having a passport without your name and picture in it. Actually, having a passport for a vaccine in general is a dumb idea and everyone should oppose that - this is not returning to normal.
593	So basically there could have been a vaccine for HIV years ago but because it mostly affects gay men and Black people there hasn’t been the same amount of effort as the COVID vaccine https://t.co/XVqISsjhKw
594	TBH i’d rather a vaccine passport than having to deep throat a cotton bud every time i want to go to the pub ??
595	I lost my driving license in Ibiza a couple years ago so whenever I need ID I take my passport & everyone laughed Now that we need a vaccine passport to get a pint at our local Moral of the story; don’t laugh at Sina
596	Until we have global and equitable access to vaccines, we shouldn't be talking about vaccine passports @alexandraphelan arguing why VPs are unfair, will entrench geopolitical divides, and could prolong pandemic at @bmj_latest #covidunknowns webinar https://t.co/L3KoXTJeAR
597	Vaccine passports are not the solution. I can see the whole thing playing out in my head already - shitshow
598	I q need for vaccine passports on the simple premise that if we know 90pc of nat popn has been vaccinated, then the desired effect will have been had. no need to mandate individual proof - senseless bureaucracy and will only widen inequality https://t.co/pit3RTfgv8
599	Man's skin 'peeled off' in rare reaction to Johnson & Johnson COVID vaccine https://t.co/6cHgPJXUYb via @nypost
600	My guy said to me today that since his homeboy got the COVID vaccine he’s had 5G everywhere he goes ????????
601	Office vaccine passports: Great in principle, but businesses should approach with caution https://t.co/QZv4NxsfGR via @hybrid_ts #AWS #Hybrid https://t.co/2BkIGXzi59
602	Vaccinating everyone over 50 and pausing + introducing vaccine passports for European travel is surely going to raise a lot more generational ire https://t.co/mS7PGB06OA
603	Vaccine passports are neither as useful nor as risky as many people think, Helen Joyce tells “The Intelligence”—and either way, they are coming https://t.co/rOdrOHKzw8
604	got the date for my second vaccine dose get ready to top me gays
605	Squabbling over so-called vaccine passports threaten to undermine this summer's travel recovery in Europe https://t.co/3ZvpBZG8Eq via @bpolitics
606	@LPerrins Having my actual passport taken away from me against my will & having it replaced with a vastly substandard version was an affront to my rights, yet I was told I must ‘get over it’, or some stuff about ‘liberal tears’. If you don’t want a vaccine passport, don’t get one
607	UK launches rollout of Moderna COVID vaccine as daily shots slow - https://t.co/6RFRn4TF4M https://t.co/3GYGzLbAmq
608	European Medicines Agency links AstraZeneca's Covid vaccine to very rare cases of unusual blood clots https://t.co/OoZdQH0YM7
609	This needs to be corrected, @FT. ‘under 30s will be offered an alternative vaccine where possible’ is not the same thing as ‘under 30s should not use the Oxford vaccine’ https://t.co/bWt83LxI7W
610	I’m having a massive panic attack about this whole vaccine thing fucking hell
611	I’m having a massive panic attack about this whole vaccine thing fucking hell
612	i was told to avoid it because the dataset for having both a high risk for the clot profile and having the astrazeneca vaccine was so so low that the doctor couldn’t rule it out, but felt that on balance the very very tiny amount of data was something for me to take caution on
613	One of the side effects of birth control pills is Sudden Death... excuse me if I don't feel anything for this alleged potential for very rare blood clot from the Oxford AZ vaccine
614	Like many women who took the combined oral contraceptive pill for 20+ years, I'm currently rolling my eyes at some of the hyperbolic coverage about the much much much smaller potential risk of bloot clots associated w the AZ vaccine ?? #VaccinesSaveLives https://t.co/0YdIn089mg
615	I'm getting the Covid vaccine today ??
616	Petition: Do not rollout Covid-19 vaccine passports https://t.co/MCzB6sUAaX
617	How are people in America getting vaccinated and I’m still waiting for that text from the NHS ??
618	Me, under 30 learning under 30s shouldn’t have the #AstraZeneca vaccine 6 weeks after having my first dose?? #COVID19 https://t.co/7fU4ao3ZjC
619	@spwc321 @NHSuk None if the vaccine is working as they say. In fact the vaccinated may be infected and spread it to the unvaccinated. Courage though, you might not have the unvaccinated at the stadium but they will be everywhere else, trains, buses, shops ??????????? be very scared!!!!!!
620	This is very scary tbh. Especially considering the covid stuff about they’re not letting people evacuate if they haven’t been vaccinated. I fucking hate this
621	Walking past the completely empty pop up Covid vaccine centre for the 50+ in Streatham Library is really annoying. I don't see why if none of the 50s want the bloody vaccine they can't just let anyone walk in.
622	The effectiveness rate of a coronavirus vaccine from Sinovac, a Chinese developer, at preventing symptomatic infections has been found to be as low as 50.4%. By comparison, the vaccine made by Pfizer has been found to be 97% effective. https://t.co/18EVz8lbyK
623	“The effectiveness rate of a coronavirus vaccine from Sinovac at preventing symptomatic infections has been found to be as low as 50.4% by researchers in Brazil. By comparison, the vaccine made by Pfizer has been found to be 97% effective.” https://t.co/vBsDiYHBvE
624	@Jen70717630 Because people of color are less likely to get vaccinated AND are more likely to die from Covid (due to poorer health), we have deemed this notice to be racist!! Please take it down immediately and consider something more inclusive
625	The Covid vaccine has killed me off
626	@MonicaGandhi9 @sailorrooscout how do I convince my friends that vaccinated people are at a very low risk of transmitting covid to others ?? some of my facebook friends act like vaccines don’t help with transmission at all
627	Why is the #herdimmunitymonday timeline filled with such polarised opinions? After a year of lockdowns and after all vulnerable people have been vaccinated, surely it's now okay to gently open up the economy a bit. Wear a mask indoors, be respectful, it's not that hard.
628	Classic BS from the independent SAGE clowns. Neglects to mention that 1) we have vaccinated far more people than Chile did when they re-opened 2) Chile used the Sinovac vaccine which may have an efficacy as low as 3% after one dose https://t.co/Po5NHKMio8
629	@DoodleHans @dr_barrett @ClareCraigPath 4. The vaccines don't even work immediately, so your data point is even more wrong. 5. We had a higher peak in last April compared to this one. By your 'logic' we should be seeing deaths increase not decrease as more people are vaccinated. So much wrong in one table.
630	@DoodleHans @dr_barrett @ClareCraigPath 4. The vaccines don't even work immediately, so your data point is even more wrong. 5. We had a higher peak in last April compared to this one. By your 'logic' we should be seeing deaths increase not decrease as more people are vaccinated. So much wrong in one table.
631	I’m still unvaccinated though so in my case it would have had to have been asymptomatic or low symptom covid messing me up as opposed to the vaccine
632	For the record, this event was not asking for people to be vaccinated or to turn up with vaccine certificates. It was due to be next weekend, not sure if you’ve noticed but no one has a vaccine certificate yet. So your right to your version of freedom has just cost me mine.Ironic
633	I can't believe Matt Le Tissier is making me want to defend a comment made by Boris Johnson... He doesn't admit the vaccines don't work, it's just that seeing as only 5m people are fully vaccinated so far it's quite obviously the lockdown that's led to the reduced transmission https://t.co/2LiXCk8kUs
634	I can't believe Matt Le Tissier is making me want to defend a comment made by Boris Johnson... He doesn't admit the vaccines don't work, it's just that seeing as only 5m people are fully vaccinated so far it's quite obviously the lockdown that's led to the reduced transmission https://t.co/2LiXCk8kUs
635	So one in a million Johnson and Johnson vaccinated people get a blood clot and it is not even clear if there was a causal link yet still the vaccine is stopped. On this basis no-one should ever be allowed on an plane again let alone be prescribed the pill. It is crazy.
636	@Reuters Why doesn’t the @spectator & @MailOnline & @Telegraph report on this? Because it doesn’t fit their narrative. This pandemic is far from over. Why doesn’t @BorisJohnson realise AZ vaccine will kill a lot with blood clots & he should back Novavax & Moderna in a Huge way.
637	bellefleur commented on MailOnline: This whole vaccine doesn't make sense to me. Once people are vaccinated, they are still able to get covid, they... https://t.co/taeWgssZx6
638	Yesterday, I booked an appointment for my second dose of this vaccine, and here's why, "The risk of severe blood clots in the brain from Covid-19 is about eight times greater than the risk associated with taking the Oxford-AstraZeneca vaccine" https://t.co/TIGE1H7zGF
639	Yesterday, I booked an appointment for my second dose of this vaccine, and here's why, "The risk of severe blood clots in the brain from Covid-19 is about eight times greater than the risk associated with taking the Oxford-AstraZeneca vaccine" https://t.co/TIGE1H7zGF
640	and the "vaccine bounce" thing is so bizarre because the tories are exactly where they were in like October when the tiers were failing dismally and no vaccines were announced
641	@ch_rri_boi ???? I remember booking my hepatitis b vaccine and the GP’s hold music slapped, it was giving me 2k16 gaming remix
642	Oh dear more scaremongering from the government to push the vaccine agenda that hasn’t worked. How long now till more people realise it’s all complete bollocks. https://t.co/n5qixGjVg5
643	@Fox_Claire I’m not a fan of national sheep training ( aka football ) but vaccine passports are just another bungle during the great covid over reaction
644	Coronavirus: EU urged to adopt 'vaccine passports' https://t.co/jiZc8pa0rP
645	If we need vaccine passports to enter a pub, I'll start identifying as a "vaccinated person" and if anyone dares to say anything different, I'll be reporting it as a hate crime and have them cancelled. Pronoun, I'm-vaccinated.
646	Pfizer vaccine: had my second dose yesterday and felt fine, today however has been a total write-off. Felt fine after the first dose (& don't usually react to flu jabs etc.) but I'm basically bed-ridden for the day, so just be aware re potentially booking time off.
647	Why we shouldn’t worry about Covid vaccine blood clots. ‘For the entire winter wave, one day’s delay to being vaccinated has been riskier than vaccine itself' https://t.co/KPSZL9nZ1V
648	Why we shouldn’t worry about Covid vaccine blood clots. ‘For the entire winter wave, one day’s delay to being vaccinated has been riskier than vaccine itself' https://t.co/KPSZL9nZ1V
649	@thfchxrry majority of people have been vaccinated, honestly hate people saying this, they’ve only just got to the over 45s, the people down the pub are younger than that, they can still get and spread the virus, and just because people have the vaccine, doesn’t mean they’re fully safe.
650	Swear to god vaccinated people better shut up https://t.co/2FUzHIfyK2
651	Why there has to be an age barrier to get Covid Vaccine. India is focusing on a minority of the 55+ population which are yet to be vaccinated(for a variety of possible reasons),while the overwhelming MAJORITY of new cases & those filling up the ICUs are under 55 and can't get it.
652	Vaccine passports, definitely not a fan
653	COVID vaccine has many side effects https://t.co/s3B5U7TD5N
654	@4_kidney So the vaccine also not effective at reducing ‘sickness’ burden of covid in the patient group. And there was me hoping for a slight return to normality. Sigh.
655	Unexpectedly summoned to my second vaccination dose tomorrow evening. Looks like Wednesday will be cancelled. ??
656	A nurse who misrepresented herself to be a doctor defends wasting thousands of COVID vaccines via /r/videos https://t.co/8n67qN4ggW
657	@DrHilaryJones claiming that the vaccines haven't yet made a difference in the drop in deaths from Covid is unbelievable. Plus, lockdowns make no difference if we've been socially distancing anyway. Closing business's that could have operated safely is outrageous.
658	I predicted last year that as this covid bullshit is all planned, bars and clubs are going to require guests to have "vaccine passports" to enter the premises
659	Israel prepares second COVID vaccine round, expects to include children https://t.co/4SmR1pr85m
660	We got covid Vaccine but not for Pollen lmao https://t.co/sSSe3lpsP2
661	Most of the demand for this covid poison "vaccine" is completely made up by the media to farm compliance. Looks like it's not even working in blue cities. https://t.co/f41ByotJuU
662	The covid vaccine side-effects seem to be a bit of a lottery and I have *lost* ?? I’m just so unwell. Had to take the day off work. https://t.co/mwKb5HYRas
663	Like getting people to get free vaccinations wasn’t hard enough, so now he’s suggesting we put up more barriers so people don’t get vaccinated. https://t.co/fZv8l83InI
664	The US is stockpiling AZ vaccines that will NEVER be used, and restricting the exports of essential raw materials for vaccines that it doesn't need while poor countries like India burn. At least Trump didn't pretend to be the moral authority of compassion by withdrawing from WHO https://t.co/neBlSiSiKJ
665	@KamalaHarris You greedy Americans still your not considering the ban for Covid 19 vaccine raw material exporting to India.
666	@yarruMwerdnA @TradeFloorAudio @DeItaone Yeah duh, as if the EU would expect production to be started on an unapproved vaccine. The ‘best efforts’ excuse is a total cop-out. Funny how you say the EU drew up that contract but there’s also a ‘best efforts’ basis in the UK contract too. In any case, the AZ vaccine is shit
667	@CraigM350 @linzirob @DarrenPlymouth People are getting vaccinated so hopefully it won't last that long and we can get back to some normality but they will throw us into another lockdown ?? I don't want it anymore than those protesting today but today potentially could have been a superspreader event? ??
668	Petition: Do not rollout Covid-19 vaccine passports https://t.co/fzRyNPlJ3s
669	@telepathygreys the US government has enough doses to vaccinate its people 6 times over ... why doesn't miss selena ask her own president first ??????
670	Petition to suspend the patents of the Covid vaccines to allow more countries to produce them https://t.co/K2PmpDRAJR
671	EU sues AstraZeneca over shortfall in Covid vaccine supplies https://t.co/zBi0k5hcQP @MailOnline
672	@EssexPR Reporting is negative,biased Biden since February banned a raw material to be exported to India which is needed to make vaccine politics&greed wanting to sell USA vaccine more.India has vaccinated more people than UK however population is huge so percentage low&their NHS is weak
673	It is just a mask, there is no such thing as Great Reset, vaccine passport are conspiracy theories... sigh ?? https://t.co/UpnB4grlcG
674	If you’re taking covid vaccine advice from the dude who hosted fear factor twenty years ago, then you need your priorities checked. #fearfactor
675	@misquish I doubt that the companies will waive the patents, and the UK has shared zero vaccines, and we are about to start vaccinating the next group of people imminently. Would govts force them to waive their patents or will they kiss their ass??
676	If you have any concerns about the Covid vaccine like “uncle John” watch this https://t.co/fYWlYUjBp7
677	@amitkohli1976 @Ella32823623 Spot on variants and vaccine passports are the threat to pushing this vaccine, it all started off for the old and vulnerable and protecting the nhs, now cancer and heart trouble have taken over, this covid charade is a smoke screen.
678	Vaccine passports are being pushed by attention seeking celebrities to pressure healthy people into getting an experimental vaccine they don’t want or need.
679	@ritch3y @BreesAnna If the spread of covid is squashed by enough people being vaccinated then the few who don’t get vaccinated will also benefit.. this is not hard!
680	I never react well to vaccines. Had the first dose of Astra Zeneca on Friday: headache, general soreness, and very tired. Still, I now have a special antenna to capture 5G signals, so not complaining. (I think microchip comes with the second dose ????).
681	Smerconish: challenge with your suggestion of only having fully vaccinated people in the Biden speech as a carrot (and stick) is that Fox would say “See - now they will not all ALL Americans in!” https://t.co/vDzLcj7xwa via @YouTube
682	35million people vaccinated and I haven’t even been offered a test yet ??
683	They must not allow tourists in the uk without positive proof that they have been tested for corona virus.Having two vaccines doesn't mean they have no virus.This is a big mistake by the government.
684	From what I'm hearing this second dose of vaccine about to end my whole existence https://t.co/IMprGbQDpE
685	Had my Covid vaccine yesterday and have literally has all the side effects listed on the NHS website a sore arm where the needle went in feeling tired a headache feeling achy feeling or being sick - this is the worse. Still being sick this morning ??
686	Let's use the infamous, greatly exaggerated (https://t.co/LrNTChHtTu) estimate of ~500k deaths by Prof Neil Ferguson as a starting point. Given the number of existing deaths (150k), 99% of such people have been vaccinated and nearly 100% vaccine effectiveness 2/x
687	Pfizer’s obscene $900m profit from its Covid vaccine in just three months proves capitalism and public health are bad bedfellows https://t.co/fclZfzEdJM https://t.co/QKrUIyKCta
688	ughhhh people be refusing to get AZ vaccine I would get stabbed with anything really, just give me something
689	Shocking. Dangerous, experimental Covid19 'vaccines' from evil Bill Gates and his colleagues in Big Pharma. Translation: Pfizer's coronavirus vaccine has killed 40 times more elderly people than the virus itself https://t.co/YUpmbZxYxk
690	@MattHancock It is disgraceful to see this Gov manipulating corrupted data and impose unethical propagandas. Numbers do not add up and people stopped opting in to get vaccinated. This Gov failed to protect British people and their health. It lost the trust of people. @novavitaelondon
691	The way the stupid side of the media did so well in spreading fake news about the covid vaccine, especially in South Asia, the cases are atrocious in Sri Lanka and India there’s a lack of vaccines AND ppl are scared to get vaccinated
692	@Twitwr16 @piersmorgan @Keir_Starmer Billions of pounds lost in dodgy contracts, failure to lock down soon enough, dithering on masks, "let the bodies pile up", "we did everything we could". The only thing he's done right throughout this entire thing is the vaccine rollout. Everything else has been a royal cock up.
693	All I want is a chance to at least book an appointment for a vaccine, but here I am trying to learn code and sign up to bots to get a slot lol
694	If you are trying to book a vaccine slot on a browser like Safari then you are an idiot. Use a super fast browser like Opera.
695	To take the COVID vaccine, you must either feel very vulnerable to COVID or be a socialist.
696	Covid vaccine booking system to be amended within the next few days to allow pregnant women to book vaccines https://t.co/hjcBjyGPIe
697	Covid vaccine booking system to be amended within the next few days to allow pregnant women to book vaccines https://t.co/hjcBjyGPIe
698	people out here not understand the privilege their drowning in by just saying no to having the vaccine. you ungrateful swines.
699	The Security Interviews: Why helpful bots could hurt vaccine roll-outs https://t.co/dCDMYSNkEh #network #broadband #5G
700	You'd think the algorithms would notice that I'm not exactly going to take much persuading to book my vaccine when it's finally offered to me... ?? https://t.co/MpEF7VbXKp
701	I AM NO SCIENTIST BUT...I could have hypothesised this given pretty much everyone I know who had AZ (inc me) had those side effects & most people I know who had Pfizer had none! Covid vaccines: Mixing increases reports of mild side-effects https://t.co/vNEF4xD22N
702	@BlueFire94 Agreed, and this Indian variant, people need to be careful and need more people vaccinated
703	If you had the 50p Costa drinks this week, don’t worry about what’s in the vaccine
704	Press: pm why didn't you redlist India soon as the variant was known? Bozo: err blather nonsense dither blather something in Latin more blather leader of opposition didn't support us brexit, vaccine roll out. More Latin. More blaming opposition, more blather, defers to Witty https://t.co/dhtHDuesQJ
705	have not worked since mar 2020 as work in hospitality ,am grateful for furlough but feel like a fraud getting paid for not doing anything.We have a vaccine and treatments available that work and still they scared to let people get on with there lifes makes no sense at all
706	Indian variant can 'spread like wildfire' if people not jabbed - but 'confidence' vaccines work https://t.co/GJKzm0YQnf
707	Indian variant can 'spread like wildfire' if people not jabbed - but 'confidence' vaccines work https://t.co/L9soc5dj5m
708	In March, over 750k people were vaccinated in one day. It’s now only 180k. Is this as a result of the vaccine shortage? Can someone make more? I want my vaccine ?? https://t.co/OsLRb5uySL
709	Hi y’all I have anxiety, I’m getting my 2nd covid vaccine this week and it’s AstraZeneca. Pls I know the risk is super small and I’m definitely still getting the jab but I’m nervousssss tell me I’ll be fine ??
710	This is the effect of vaccines on long Covid https://t.co/9bTqE7zTbK
711	> covid vaccine > doesnt give you covid wtf is this sh*t
712	Booked a precautionary day off work just in case my vaccine turned me into Bill Gates or some shit. Feeling good so far though so I will instead be spending the day locked away watching actual films at an actual cinema for the first time in forever https://t.co/ZVRHazy4OY
713	Booked a precautionary day off work just in case my vaccine turned me into Bill Gates or some shit. Feeling good so far though so I will instead be spending the day locked away watching actual films at an actual cinema for the first time in forever https://t.co/ZVRHazy4OY
714	booked my vaccine & got ill. that’s not how that works. why do i have to be so dramatic about everything.
715	Hateful hypocrisy: In hate crime-obsessed Britain, vilifying Covid vaccine ‘refuseniks’ comes with establishment approval https://t.co/eBlNtAJLlM
716	They can’t be introduced unless majority of people have been vaccinated. This will only happen if people remain scared of the virus.
717	I’ve heard the vaccines don’t work unless you post a picture of the card on insta and twitter.
718	Me dragging my 2x 25kg suitcases from Devon to London after my 2nd covid vaccine on Monday ?? https://t.co/nlbNcxuCKY
719	@LoloFennec Like that wasn't predictable, for me CDC's advice about masks being optional for vaccinated people was the worst advice they ever made exactly because of that reason, the cases are still way too high and not enough people are vaccinated to do anything like that...
720	Second Covid vaccination on Tuesday and the FEAR of having the side effects I had from vaccine one is reeeeeaal ??
721	Christmas has come early: got my bloomin vaccine booked!
722	#2021Problems: hoping the NHS/my GP won't label me an anti-vaxxer because I haven't taken up the vaccine appointment I was offered yesterday ?? (I'm part of a vaccine trial so I've already had my first jab of either AZ or a vaccine not on the market yet)
723	Great Vaccine webinar today on COVID misconceptions at 7pm London time 9pm Baghdad time using link below https://t.co/TAWqVVBaAS https://t.co/LeFpvkjoCg
724	omfg I just managed to book both of my vaccines! ??
725	Petition: Do not rollout Covid-19 vaccine passports https://t.co/7qjk5B3W5o
726	Also, it sounds like if they do go ahead with these "vaccine passports", then all of the young people will be stuck in the country as they will be the last to get vaccinated ?? https://t.co/Ludzz5QN5q
727	Nearly booked the 2nd vaccine the day before my half-marathon... whoops! I did stop myself before pressing “book” and now it’s the day after ??
728	The conservatives who refuse to get the Covid vaccine remind me of children who refuse to take their shot because they’re scared of needles. C’mon now, take your vaccine and you’ll get a lollipop.
729	The acting premier complained people aren’t getting vaccinated and said people should book a vaccination. In each of 20+ calls to book, I get an automated message saying there is a technical issue and the call is dropped. Maybe this is why people aren’t vaccinated?
730	I like other people even less since I had my covid vaccine so it might just enhance your current abilities rather than give you new superpowers
731	Covid vaccine side effects are like hangover but you don't get the fun night before that you don't remember
732	Quite typical of me to get Moderna, the vaccine that is much less mainstream than Pfizer or AZ.
733	Second dose of the vaccine and I have the most terrible headache. Now fully vaccinated ??
734	@PoliticsForAlI @thetimes Can't wait until the boomers are jetting off to benidorm while I'm not allowed in Tesco because I don't have a vaccine passport
735	Petition: Do not rollout Covid-19 vaccine passports #vaccinepassports #Petition #Covid19 https://t.co/0uug9D1WN3
736	England’s biggest COVID vaccine centre in west London breaks policy to offer jab to anyone over 18 for today only - Sky News https://t.co/duxoNwZA9g
737	You can add vaccine scepticism to the list of things millennials have allegedly killed https://t.co/sQGaSi9B8N
738	Slightest of slight headaches tonight, probably will subside and pass, nothing of great concern, but having had the second dose of vaccine today, might keep one eye on it just in case.
739	Slightest of slight headaches tonight, probably will subside and pass, nothing of great concern, but having had the second dose of vaccine today, might keep one eye on it just in case.
740	What was the point in having the vaccine if I can’t travel and live my life. You’ve stolen our lives and ruined our careers. I hate you right now @BorisJohnson
741	The reasons why second dose of COVID-19 vaccine has worse side effects https://t.co/m1MprHQxPB
742	There is a part of me that wonders if the conspiracy theory that there are GPS trackers in the Covid vaccines essentially boils down to a dog owner in Florida remembering that Mister Snoofikins got microchipped at the same time he got dewormed and vaccinated.
743	Covid vaccines: Boris Johnson pledges to jab the world by end of next year https://t.co/NWxhcvlmFh
744	Made the same mistake and gotten rat-arsed after having my vaccine again so I can’t tell whether it’s side effects or hangover.
745	sad to report that no vaccine was booked as there is no second centre for me ?? as soon as someone wants to stick a needle in me, i'm ready https://t.co/zoI0lgmCcT
746	First and second doses of the vaccine booked ?? ?? I am emotional! First one on Wednesday too ??
747	First and second doses of the vaccine booked ?? ?? I am emotional! First one on Wednesday too ??
748	If I have to be up all night to book the Covid-19 vaccine, I will.
749	I’m in a queue to book my vaccine like I’m trying to buy festival tickets
750	Finally got through to book my Covid vaccine after over an hour of failed attempts ????
751	Finally got through to book my Covid vaccine after over an hour of failed attempts ????
752	trying to book my Covid vaccine and there are 10,000 people ahead of me in the queue, feels like trying to get Glastonbury tickets
753	trying to book my Covid vaccine and there are 10,000 people ahead of me in the queue, feels like trying to get Glastonbury tickets
754	Booking coronavirus vaccines on the NHS website this morning is like getting festival tickets.... waiting in a queue, then website crashes etc.
755	Booking coronavirus vaccines on the NHS website this morning is like getting festival tickets.... waiting in a queue, then website crashes etc.
756	i'm not 25 for another two months so can't book a vaccine lmao rip
757	Feel like I should admit that I actually managed to book my vaccine about 2am this morning ????
758	Why did I just book my second vaccine to be in Finchley
759	as 25+ year olds are invited for the Covid Vaccine, i am still baffed about not being considered a “priority” as a 20 year old Asthma Sufferer …
760	Hong Kong is so desperate to get people vaccinated that it's auctioning off a Tesla, a year's worth of stays at a 5-star hotel, and a $1.4 million apartment https://t.co/62uPuUInUA #trademoneta #finance https://t.co/Tfh6IAJrQw
761	Ill never understand why people were flexing their COVID vaccines like 4PF chains…
762	Of course this idiot had to book his vaccine during the England/Scotland game! ???????
763	TRANSATLANTIC TRAVEL FOR FULLY VACCINATED PEOPLE. J1 VISAS. NO MORE NIE REQUIREMENT ???? that’s all I wanted from today’s news
764	They just haven’t vaccinated enough people
765	Got my Vaccine booked but idk if I’m ready for them to put a chip inside me
766	And just like that, COVID deaths didn’t matter anymore. Cases seemed to be in the lime light which of course is of no relevance since the vaccine roll out was said to be working ??
767	A better plan would be to have a vaccine that works but looks a little suspect and then release a deadlier variant that wipes out all those that weren’t mindlessly compliant.
768	Got the COVID vaccine. Did not get the sticker. ????
769	@trq_less @vivalatony @FredNurf @PoAmBrotherhood A terrible analogy indeed, but designed to mock you some what. You are honestly clueless how vaccines work Adam, so do some basic research on Google or read the 50 or so words Ustin wrote then stop embarrassing yourself.
770	I still can’t believe in December I had to buy scampi and chips and leave a few bits on my plate for 4 hours so I could stay and have a beer...7 months later I still can’t go to the bar after having 2 vaccines..fuck this bollocks ...I’m burning the mask as of June 21
771	Rolling back #freedomday 4 weeks so more people can be vaccinated fails to make sense when adults under 35 can’t get a second jab till August. If that was the case how about using the designed dosing schedule?? 3 weeks for Pfizer, 4 weeks for Moderna… https://t.co/vb3KdnGHDs
772	@arkmedic Older people are more likely to have been vaccinated, and age is a hugely important factor in mortality. If you don't account for this, well, garbage in garbage out.
773	screw covid , make a hay fever vaccine
774	Eric Clapton took loads of drugs, had a racist rant, and now wants to tell the world having the vaccine isn't a good experience. This old man should shut up!
775	Covid is a global issue and instead of using the same misinformation tactics as the Russians, the West ought to be making vaccines more accessible to developing nations???? @AnastasiaaK713 on how the Russians are using vaccines to play geopolitical games ?? https://t.co/tvX0rTFtoD
776	They’re not going to give fully vaccinated people more freedoms because not everyone’s been offered it, the uproar would be unreal https://t.co/ErcMMp1qXr
777	bruh, hayfever and this covid vaccine and fucking me HARD right now.
778	Petition: Do not rollout Covid-19 vaccine passports https://t.co/fB1aBbEqCh
779	The texts I’m getting about booking my Covid vaccine are tooo much??
780	The texts I’m getting about booking my Covid vaccine are tooo much??
781	It’s started already ?@EssexPR? Pfizer supply shortage forces Covid vaccine rollout to slow down https://t.co/m8wKnmAAcT
782	I’ve booked my vaccine, the whore era I never got is coming x
783	got a covid vaccine just so my bullets would stop social distancing with last
784	I’m having such trouble trying to book my vaccine maybe I’m just not meant to be a part of the Pfizer Chiefs ??
785	I think people are forgetting that the key word about these covid vaccines is that they are experimental
786	Fuck a Covid vaccine, find a hayfever one I’m suffering mehn
787	@_utdbrad @PoliticsForAlI Cases are irrelevant because all the vulnerable people have been vaccinated twice or offered it. You could have 100,000 cases a day and it would mean nothing because the number of people who will die at this point is negligible.
788	Going to be interesting booking a vaccine, if both doses are at the same place, either way I’ll have to travel 100+ miles to get the second
789	Also the vaccine roll out for under 30s means most young people won’t be double vaccinated till late August probably even early/late September.
790	@wolfz8k people dont understand that they cant just made a working vaccine within a year and expect it to be safe, vaccines normally take a few years to be perfected
791	'It would be discriminatory': UK vaccine minister says government is NOT planning #COVID vaccine passport https://t.co/DPq8HMV1G9 https://t.co/6NbjBO4yoA
792	Genuinely dk how to deal with anti-vaxxers in my friends circle ?? I get not wanting the Covid vaccine / having concerns, but seeing some people actively posting anti-vaxx shit or stuff that’s been debunked is a bit ????
793	A negative antibody test does not mean the Covid-19 vaccine did not work https://t.co/BjnFNn4wzF via @qzindia
794	I’m tired of arguing about the COVID vaccine when I’m drunk. Leave me alone??
795	I start this #FathersDay by telling my Dad he's an absolute twat for punching my arm yesterday, after having my Covid vaccine. My arm is fucking raw right now.
796	I start this #FathersDay by telling my Dad he's an absolute twat for punching my arm yesterday, after having my Covid vaccine. My arm is fucking raw right now.
797	COVID Vaccine really making my arm feel like it wants to pop right out
798	So we can only conclude the vaccine doesn’t work. #COVID19 #CovidVaccinesideeffects https://t.co/yjwQtiCoss
799	Imagine waiting well over a year for a covid vaccine and then getting fresh with volunteers because there's a massive queue
800	The way this COVID vaccine has my arm sore. I’m so glad I decided to get it in my left arm cause if it was in my right arm I wouldn’t be able to do shit.
801	I am currently suffering from covid (confirmed PCR yesterday) despite having both my Pfizer vaccines (second one in March). The symptoms are pretty horrid and important to note could feel like a bad cold, but I am sure that having those vaccines will help me fight it off quicker!
802	Why isn’t there a Facebook auto profile pic thing that says I ain’t having no vaccine so fuck off
803	@MalumeSharepart @Evidence_Shongw @MararaMoabelo ANC failed us, they should have vaccinated people long time and built hospitals with bigger capacity.
804	That sleep paralysis demon/covid vaccine nap combo nearly just got me ngl
805	Shapps says they can't offer fully vaccinated people quarantine free travel as not everyone has been offered a vaccine yet. Well sorry but as a selfish fully vaccinated person I think this is bullshit ??
806	I’m not sure whether I have covid or it’s just symptoms of the vaccine
807	The day after getting the covid vaccine is messed https://t.co/VSQVD2KjZZ
808	Sorry to say I’m sweating and snivelling in bed with covid, despite having had my first vaccine. Go and get your second one as soon as you can, people. This is really miserable
809	The worst thing about the AZ vaccine is the feeling of guilt. I finished early on Weds, didn’t work on Thurs, and did some work today but was mostly ineffective. But I wasn’t feeling “bad” which seems like it would make it ok, I just couldn’t think.
810	The worst thing about the AZ vaccine is the feeling of guilt. I finished early on Weds, didn’t work on Thurs, and did some work today but was mostly ineffective. But I wasn’t feeling “bad” which seems like it would make it ok, I just couldn’t think.
811	WHO says fully vaccinated people should continue social distancing to stop community transmission of delta variant https://t.co/3fE4dJQ86J
812	Delta Covid variant may be edging race against vaccines https://t.co/3mRU8S2BuK
813	Had to take a guess because there was zero information on the NHS website about second dose walk-ins. I suggest reddit for walk-in vax goss/info https://t.co/wWeP7FQzZx or just head down to your local as a chancer like me. Good luck out there ?? jab jab jab jab jab lovely jab
814	By the time the vaccine roll out gets to our age group, there will be nobody left to vaccinate ????
815	when i went to get my first covid vaccine the doctor giving me my jab went “oh you have skinny little arms!!”. best believe i was sat there ordering dumbbells on the car ride home from the vaccination centre ????
816	@MertzJeff Preordering vaccines and getting the population vaccinated is two totally different things. This current government has handled the whole vaccination appallingly
817	A zero “COVID” mess. Australia at a dead end: borders shut; cities locked down; federation teetering; and vaccine shortages as far as the eye can see. People fully vaccinated want to know why they can’t leave the country or cross state borders. Any answers @ScottMorrisonMP https://t.co/ci6ant9MGz
818	Just booked my vaccine ??
819	Covid vaccine uptake is declining despite calls for young people to get jabbed https://t.co/5q9UvO7fwm
820	I think people not knowing how vaccines work and then spreading false info is what annoys me
821	covid vaccine side effects making regret getting it done ??
822	Boris Johnson hearing this story in PMQs should be met with nothing other than remorse over Matt Hancock's conduct – responding with speculation over how Keir Starmer would have handled vaccine roll-out doesn't help these parents https://t.co/L8GRvF7AnG
823	It’s disgusting that women aren’t warned that their first period after the Covid vaccine might be awful. I couldn’t leave my bed for 4 days. A heads up would have been appreciated.
824	Germany recommends mixing Covid vaccine doses https://t.co/DqZ70XMiu0 via @MailOnline Scientists claim that the mixing of vaccines is illegal, who is sued when the mass experiments fail in 2023 knowing combined vaccines change human Genetics forever.
825	Haven't worked in hospitality for over 8 months and I chose for my return today to be 2 x 5 hour garden parties in different ends of London in 24 degree weather wearing all black on the day after my covid vaccine. Can't say I'm currently proud of my choices
826	had my covid vaccine and nearly passed out in a middle of Selfridges two hours later lol
827	The government is not being transparent about the risks': Inventor of MRNA vaccines says people should not be forced to take experimental COVID vaccines because risks aren't known and under 18s and those who've had virus shouldn't take it.. https://t.co/6eC5H7tGyO
828	@ProfPCDoherty @tonybmorton Can draw a direct line between making policy decisions via press release for car parks and trying to do the same for vaccines, only to find it doesn't actually work.
829	I will still be wearing a mask after July 19th, to protect myself and others. Lots of the population are still unvaccinated, some people cannot be vaccinated or their vaccine won't have worked, but we don't yet have herd immunity and have a large amount of covid in circulation.
830	I will still be wearing a mask after July 19th, to protect myself and others. Lots of the population are still unvaccinated, some people cannot be vaccinated or their vaccine won't have worked, but we don't yet have herd immunity and have a large amount of covid in circulation.
831	My COVID vaccine is on this Saturday I am shitting myself ????
832	@GMB Are we really doing this?! He could have been that poorly having the vaccine, this is so wrong. Free tickets to euro finals, no need to isolate, we will be giving away money soon
833	@TFL, 6am-7pm Jubilee line trains have an insane amount of people without masks. On my way to vaccinate people, and my journey there is not safe! Travelling in unsafe trains means putting not only myself and family at risk, but the whole vaccinator team!
834	After being ill with long Covid for 16 months I've finally been double jabbed, which has helped with a lot of the symptoms and means I should be ready to go and get back to my life. But several people I know have been (badly) infected with Delta after being fully vaccinated...
835	More cases mean higher risk of infection (can still get sick w/ COVID despite double vaccine) & risk of more staff having to self-isolate. This risks crippling the NHS workforce and endangers patients. The Govts reckless plans for abandoning masks must be stopped @Keir_Starmer https://t.co/59ZrFdU9aY
836	@petemorristwit @LordLindley Simple enough whole thing is a scam aiming 2get the vaccine into the scared sheep, we have drugs that work, Ivermectin for 1 butFDA in US would not grant a licence for a untested drug if alternatives are available, it’s all lies, peeps will be dying of that u C
837	I get second hand embarrassment every time I read the comments under shadeb*rough’s posts about the Covid vaccine ??
838	@Reuters A risk of what exactly? Mostly of the people are vaccinated and the death rate is basically the same of the seasonal flu if you have had both of the jabs. Stop spreading fears about COVID, people don’t care anymore!
839	@KakanTuring China goes on the defensive as Covid vaccine diplomacy backfires https://t.co/fPMLQ3vZuD
840	We are proud to once again be hosting a mass COVID-19 vaccination clinic for anyone over the age of 18 on Sunday 18 July, 10am-6pm. ?? The clinic is for first or second dose Pfizer jabs only. Details ??
841	Pfizer says it's time for a Covid vaccine booster; FDA and CDC say not so fast - CNN https://t.co/2jSvRybQuH
842	With the new UK COVID wave I wonder whether the number of infections is highly underestimated this time. With the amount of people vaccinated it seems likely that there is a lot more asymptomatic infections now, in which case the exponential growth will be even worse.
843	The only thing worse than Oxford being unbearable about the vaccine is if it turned out Manchester could be unbearable about the vaccine https://t.co/mwhmUmvFuZ
844	The stadiums acc full hahahaha bruh i need to book my 2nd vaccine
845	Covidiots stupidity knows no boundaries. GP staff receive abuse every day over Covid vaccine reminders https://t.co/UYf3artCAG
846	im confused cos so many people have had the vaccine but covid cases are worse than ever and it’s getting just as bad as last year so when does it actually end ? just want normal life back luv
847	Nothing at all to worry about... Pfizer Covid vaccine: Side effects may include pulmonary embolism | https://t.co/YN48Bgxe6u https://t.co/4dEbnUq13k
848	Nothing at all to worry about... Pfizer Covid vaccine: Side effects may include pulmonary embolism | https://t.co/YN48Bgxe6u https://t.co/4dEbnUq13k
849	when vaccines are rushed to market. For example, the swine flu vaccine, Pandemrix, rolled out following the pandemic of 2010,resulted in over one thousand cases of narcolepsy, a devastating brain injury, in children and teenagers, before being withdrawn.6 Dengvaxia, a new vaccine
850	#London hospitals refuse to say how many #COVID19 patients have been #vaccinated ?? ?? ?? This is very worrying. Are the vaccines really working as well as the government claims #ToryCovidCatastrophe #ToryLies #BorisTheButcher https://t.co/8Q6grz5wTj
851	and u lot that are saying they fast tracked the covid vaccine, they did but it doesn’t mean it didn’t go through the necessary steps. Instead of doing the clinical trials in phases, they conducted all the trials simultaneously…pls research before u speak!!!! It’s annoying
852	Just had the first dose of the Moderna COVID Vaccine, felt so sick and nearly fainted and had to have medical attention, Friday afternoon going lovely ??
853	I get covid now I want to push forward my second dose of #pfizer and told I can’t because it has to have an 8 week gap?!?
854	Why do people love spreading misinformation about the Covid vaccine.
855	This covid vaccine is actually killing me wtf??
856	I’m going to scream. How many times does it have to be said that the covid vaccine DOES NOT PREVENT YOU FROM GETTING COVID. For fuck’s sake. It’s been months of this now.
857	Still don't understand why people believe that getting the Covid vaccine means you wont get Covid.... It should have never been called a vaccine, it should have been called a symptom reducer, because people auto think vaccine=cure, which is dangerous. https://t.co/QEGt6HFmmg
858	Vaccine passports is the right thing to do and should be compulsory for care workers to, GB news with NF has just stepped up to the plate eventually, with an un bias leftie view ?? https://t.co/uoOAd5SwTP
859	Airlines who demand a vaccine passport will go bust Businesses have been damaged enough without thinning down their customer base
860	Having the vaccine doesn't stop you from spreading it So being jabbed to go places makes zero sense. Fuck off!
861	I honestly feel like I’ll end up getting black mailed into this vaccine thing because ill need it to travel for work ??
862	The way they pushing this vaccine thing too hard, if you are not doubting it then I don’t know for you honestly.
863	Petition: Do not rollout Covid-19 vaccine passports https://t.co/VBALfaR1yw
864	I’m by no means an anti vaxxer and I’ve had my double jabs already but I’m in two minds on how I feel about the Covid vaccine for my child ??. Not even sure why I feel this way as they are up to date with everything else but I’m so conflicted on this. What are your views? #GMB
865	I do get that vaccine passports will have to be a thing on some level, but to do that without offering ANY slither of hope or bribe to younger people is just fucking cruel.
866	if you do coke wtf you worried about the vaccine for lmao
867	Doesn’t matter one iota if we introduce a vaccine passport it will be the requirements of the country you are travelling to that you have to comply with. Organ were you tested before you went to Antigua?#gmb
868	vaccine shouldn't be exempt from covid testing if the purpose is to reduce global infection. In fact, the moment we knew of the virus: flights to and from China should have been banned. It's a shame that the world had to get sucked into something that originated in one country
869	Covid vaccines from Pfizer destroy every system of the human body - Mondestuff https://t.co/pIDmvTGKAu
870	Bitches out here letting men spit in their mouths and then worrying about what’s in the vaccine
871	AstraZeneca target 2 million doses a week as Covid vaccine passports ruled out https://t.co/yGNCU2eoLO
872	I’m convinced imjustb*it is antivax at this point, all I see from their page is rare cases of bad reactions to vaccines and people catching covid after two jabs…
873	I said months ago this would happen and ta-da. Vaccine passports for a vaccine that doesn’t actually stop you from transmitting the virus ?? https://t.co/7v4JPSXagJ
874	Pfizer & Moderna Fail To Respond To BMJ About Serious COVID Vaccine Safety Concern https://t.co/MPRhvOoG24
875	@talkRADIO @PatrickChristys People like him are fools that if they don’t have the vaccine covid 19 Will continue to exist. I do not understand anti vaccine people and it’s just like having a flu jab every year and if people want to believe in all the stupid conspiracy theories then they are loss cause.
876	Vaccine passports, when the vaccine clearly states it may cause infertility. Have you lot lost your fucking minds? https://t.co/dJNF3slLmJ
877	@stevegreen39 @therealprofe2 @elpaisinenglish I know, but so many positives?? Seems to me vaccines are not working as well as we hoped ??
878	The way the #vaccine works is like if I get it covid, I won’t get sick, but I can still get covid & spread it just as easy as before. So people need to be vaccinated for life to go on, so just get whatever is available to you & we’ll be able to party in 6 weeks
879	@IGN People who are vaccinated can get the virus and spread it anyway, the only difference is that the vaccine supposedly makes the illness less severe. So it doesn't make any sense to ask for proof of vaccination under any circumstance. It is discriminatory and plain down unethical.
880	Covid vaccines: Tourists head to the US to get vaccinated - BBC News https://t.co/CSYbSbAFOL
881	Pfizer’s CEO says Covid vaccine effectiveness drops to 84% after six months https://t.co/vdLrRv1cC9
882	Walk-in Moderna (suitable for all) COVID-19 vaccination (first or second dose) at: Bencrest Chemist 67/69 Park Lane Hornchurch RM11 1BH Mon - Fri - 9.30 - 5.30pm Sat - 9.15 - 2pm #GetVaccinated #DontPutItOff https://t.co/NyZ5PwzO6v
883	So I will never be able to travel again to see all the joys of the world according to latest reports a stamp will be included in your passports to prove you have had the vaccine , I will not have the vaccine this is serious oppression and tyranny at its worst to control people ??
884	The media need to do one making up shit stories. Scare mongering the public. Passport vaccine WTF.
885	@RepDustyJohnson Then get your Republican colleagues, in both houses, to stop spreading disinformation to their constituents so that people get vaccinated and the virus stops becoming an issue at all.
886	The only govt mandated vaccine I will ever accept will be into my cold, dead, non-Covid arm. I think the reason so many vaccinated people are angry at people like me is because deep down they fear they fucked up and want everybody else to suffer if they have to. #VaxMyColdDeadArm
887	In a government that thrives on Crass Idiotic statements the one by Nadhim Zahawi "Vaccine Minister " is in a different class @NickFerrariLBC people will need a Vaccine passport to access shops Restaurants travel everything? He Must Apologise and Resign immediately of Course!
888	Some vaccinated people don’t even know how vaccines work ….. dangerously ignorant
889	If u buss a shit in the school toilets then u dont need to worry bout the vaccine
890	First thing patients who are about to be put to sleep ask for is the vaccine. And honestly it’s just so sad because it’s way too late.
891	@_WithLoveMariam I defo agree for no test no entry. But please people with the vaccine can still get covid ??
892	Australia: where fully vaccinated people are prisoners https://t.co/UxXskvN0jF
893	Why don’t you get a jab? Offspring drummer ousted after refusing Covid vaccine https://t.co/htO6Bhlknx
894	Temp at 39.8 night 1 after vaccine having not gone above 37.5 for the duration of covid. Sigh ??
895	@lbc companies that require a vaccine passport will not be getting my patronage, now and in the future.
896	@ministryoftest @Kristof_vk Fully vaccinated ????covid second dose done. Covered articles and post what i had decided to cover this week. Spoke to new people,gained some insights.??
897	I tired hearing bout COVID, curfew, vaccines and all that other cxnt https://t.co/B2h3icuWVH
898	@johnpavlovitz John have you come up with a valid reason yet why people should be forced into having a vaccine
899	Indeed but MBS kinda crashed the market in 2020 because he Felt like it so now everyone is a tad cautious & it’s a surge post Covid that may not be sustainable because NOT Everyone is vaccinated & there is shortage of vaccine globally due to patent rights https://t.co/CLcuQb9ZZ0
900	I’d rather have the side effects of the COVID vaccine than get to know someone looooool
901	This appalling! Millions of Health Workers and Clinically Extremely Vulnerable people in the Developing World haven’t even had their first jab #VaccineEquity #StopHoardingJabs UK set to ‘hoard’ up to 210m doses of Covid vaccine, research suggests https://t.co/LJ7hPWzmKl
902	Warning as people knock on doors asking 'have you been vaccinated' https://t.co/rjaFyQaCKC
903	@uveges_daniel @random__task @RichardBarrow Fair point, however the majority of people in the UK are vaccinated. In Thailand.... ??
904	@fact_covid Moderna for me only had one dose with second coming up in 2 weeks time. A very very sore arm same day as first dose, maybe a little more tired than normal but nothing else. Hope the second one is as easy!
905	Bro I need to stop listening to late nineties/early noughties pop (I'm listening to wonderwall on repeat rn) and go to bed I have my covid vaccine and work tomorrow crikey
906	Bro I need to stop listening to late nineties/early noughties pop (I'm listening to wonderwall on repeat rn) and go to bed I have my covid vaccine and work tomorrow crikey
907	I’m so sick of seeing these shitty news stories following antivaxxers getting covid and then urging their friends to get the vaccine because they felt the symptoms of the virus. Dozens of stories with the exact same flow. Idiots
908	Vaccinated with Pfizer this summer: I had a sore arm for 48h after the first dose (could not really lift my arm for 24h), while I barely felt anything after the second dose. I had covid in between doses and it was a very unpleasant week, don't recommend it at all. https://t.co/3fzhXpsZfl
909	Its really disgusting and terrifying to see accounts with tens of thousands of followers being allowed to just spread complete lies about covid and vaccines on this site.
910	The Pfizer vaccine in my system everytime I breathe in the covid in my house https://t.co/vkKj7sGyeC
911	@Lotad69 Look I know the side effects from the vaccines can be shitty, but covid is more than a running nose Jesus fuckign Christ ?????
912	@RebekahsRight Ok so if more people have the vaccine then more people in hospital will have been vaccinated aswell, as it stops the majority ofpeople getting the very worse symptoms, I was alluding to you are being disingenuous with your facts, as facts without context can be twister 1/2
913	@CheeseRoomSpurs @RachelVMartin Mandatory vaccine check isn't a thing
